# Supplementary material for: Influence of health literacy on acceptance of influenza and pertussis vaccinations: a cross-sectional study among Spanish pregnant women
Source: PubMed Central journal article supplement (PMC6042548; doi:10.1136/bmjopen-2018-022132), 2018-07-06
Supplement: bmjopen-2018-022132.draft_revisions.pdf [file bmjopen-2018-022132.draft_revisions.pdf]

# BMJ Open

BMJ Open is committed to open peer review. As part of this commitment we make the peer review history of every article we publish publicly available.

When an article is published we post the peer reviewers' comments and the authors' responses online. We also post the versions of the paper that were used during peer review. These are the versions that the peer review comments apply to.

The versions of the paper that follow are the versions that were submitted during the peer review process. They are not the versions of record or the final published versions. They should not be cited or distributed as the published version of this manuscript.

BMJ Open is an open access journal and the full, final, typeset and author-corrected version of record of the manuscript is available on our site with no access controls, subscription charges or pay-per-view fees (<http://bmjopen.bmj.com>).

If you have any questions on BMJ Open's open peer review process please email [info.bmjopen@bmj.com](mailto:info.bmjopen@bmj.com)

# BMJ Open

## Influence of health literacy on acceptance of influenza and pertussis vaccinations among Spanish pregnant women

|                               |                                                                                                                                                                                                                                                                                                                                                                                                                                                                                                                                                                                                                                                                                                                                                                                                              |
|-------------------------------|--------------------------------------------------------------------------------------------------------------------------------------------------------------------------------------------------------------------------------------------------------------------------------------------------------------------------------------------------------------------------------------------------------------------------------------------------------------------------------------------------------------------------------------------------------------------------------------------------------------------------------------------------------------------------------------------------------------------------------------------------------------------------------------------------------------|
| Journal:                      | <i>BMJ Open</i>                                                                                                                                                                                                                                                                                                                                                                                                                                                                                                                                                                                                                                                                                                                                                                                              |
| Manuscript ID                 | bmjopen-2018-022132                                                                                                                                                                                                                                                                                                                                                                                                                                                                                                                                                                                                                                                                                                                                                                                          |
| Article Type:                 | Research                                                                                                                                                                                                                                                                                                                                                                                                                                                                                                                                                                                                                                                                                                                                                                                                     |
| Date Submitted by the Author: | 02-Feb-2018                                                                                                                                                                                                                                                                                                                                                                                                                                                                                                                                                                                                                                                                                                                                                                                                  |
| Complete List of Authors:     | <p>Castro-Sánchez, Enrique; Imperial College London, Vila-Candel, Rafael; Hospital Universitario de la Ribera, Department of Obstetrics and Gynaecology,; Universidad Católica de Valencia 'San Vicente Mártir', Faculty of Nursing</p> <p>Soriano-Vidal, Francisco; Foundation for the Promotion of Health and Biomedical Research in the Valencian Region (FISABIO)., Xàtiva-Ontinyent Health Department; Universidad Católica de Valencia 'San Vicente Mártir', Faculty of Nursing</p> <p>Navarro-Illana, Esther; Universidad Católica de Valencia 'San Vicente Mártir', Faculty of Nursing</p> <p>Domingo, Javier Diez; Foundation for the Promotion of Health and Biomedical Research in the Valencian Region (FISABIO).; Universidad Católica de Valencia 'San Vicente Mártir', Faculty of Nursing</p> |
| Keywords:                     | Immunisation, Influenza, Pertussis, Health literacy, Maternal medicine < OBSTETRICS                                                                                                                                                                                                                                                                                                                                                                                                                                                                                                                                                                                                                                                                                                                          |
|                               |                                                                                                                                                                                                                                                                                                                                                                                                                                                                                                                                                                                                                                                                                                                                                                                                              |

SCHOLARONE™  
Manuscripts

Only

1  
2  
3 **INFLUENCE OF HEALTH LITERACY ON ACCEPTANCE OF INFLUENZA AND**  
4  
5 **PERTUSSIS VACCINATIONS AMONG SPANISH PREGNANT WOMEN**  
6  
7

8  
9 **Authors**

10 Enrique Castro-Sánchez<sup>1</sup>, Rafael Vila-Candel<sup>2,3</sup>, Francisco J Soriano-Vidal<sup>3,4,5,6</sup>, Esther  
11 Navarro-Illana<sup>3</sup>, Javier Díez-Domingo<sup>3,5</sup>  
12  
13  
14

15  
16  
17 **Affiliation**

18  
19  
20 <sup>1</sup>NIHR Health Protection Research Unit (HPRU) in Healthcare Associated Infections (HCAI)  
21 and Antimicrobial Resistance (AMR) at Imperial College London, London, United Kingdom.  
22

23  
24 <sup>2</sup>Department of Obstetrics and Gynaecology, Hospital Universitario de la Ribera, Valencia,  
25 Spain  
26

27  
28 <sup>3</sup>Faculty of Nursing, Universidad Católica de Valencia ‘San Vicente Mártir’, Valencia, Spain.  
29

30  
31 <sup>4</sup>Xàtiva-Ontinyent Health Department, Xàtiva, Spain.  
32

33  
34 <sup>5</sup>Foundation for the Promotion of Health and Biomedical Research in the Valencian Region  
35 (FISABIO).  
36

37  
38 <sup>6</sup>Department of Nursing, University of Alicante. San Vicente del Raspeig, Alicante. Spain.  
39

40  
41 **Corresponding author**

42 Enrique Castro-Sánchez, Imperial College London, Du Cane Road, London W12 0NN, UK,  
43  
44 [[e.castro-sanchez@imperial.ac.uk](mailto:e.castro-sanchez@imperial.ac.uk)], +44 203 313 2732.  
45  
46  
47  
48  
49

50  
51 **Word count:** 2871  
52  
53  
54  
55  
56  
57  
58  
59  
60

## ABSTRACT

### Objectives

Immunizations against influenza and *Bordetella pertussis* infection are recommended to pregnant women in Valencia (Spain), yet vaccination rates remain low. Health literacy (HL) appears as a crucial factor in vaccination decision-making. We explored the relation between HL of pregnant women and decisions to receive influenza and pertussis immunizations.

### Setting

University hospital in Valencia (Spain).

### Participants

119 women who gave birth at a hospital in Valencia (Spain) between November 2015 and May 2016. Women in the immediate postpartum period (more than 27 weeks of gestation), between November 2015 and May 2016 were included in the study. Women with impairments, language barriers or illiteracy which prevented completion of the questionnaires, or those who were under 18 years were excluded from enrolment.

Primary and secondary outcome measures: health literacy level; influenza and pertussis immunisation rate; reasons for rejection of vaccination.

### Results

119 participants were included (mean age  $32.3 \pm 5.5$  years, 52% primiparous, 95% full term deliveries). A higher education level was associated with SAHLSA\_50 (adjusted R-squared=0.22,  $p=0.014$ ) and NVS (adjusted R-squared=0.258,  $p=0.001$ ) scores. Depending on the scale, 56%-85% of participants had adequate HL. 52% (62/119) and 94% (112/119) of women received influenza and pertussis immunization, respectively. Women rejecting influenza vaccine had a higher HL level (measured by SALHSA\_50 tool) than those accepting it (Kruskal-Wallis test  $p=0.022$ ). 24% of women who declined influenza

1  
2  
3 vaccination felt the vaccine was unnecessary, and 23% claimed to have insufficient  
4  
5 information.

### 6 7 **Conclusions**

8  
9 Influenza vaccination rate was suboptimal in our study. Women with high HL were more  
10  
11 likely to decline immunization. Information from professionals needs to match patients' HL  
12  
13 levels to reduce negative perceptions of vaccination.  
14

15  
16  
17  
18 **Keywords:** influenza, pertussis, immunisation, health literacy, maternal medicine  
19  
20  
21  
22  
23  
24  
25  
26  
27  
28  
29  
30  
31  
32  
33  
34  
35  
36  
37  
38  
39  
40  
41  
42  
43  
44  
45  
46  
47  
48  
49  
50  
51  
52  
53  
54  
55  
56  
57  
58  
59  
60

## STRENGTHS AND LIMITATIONS OF THE STUDY

- This study investigated the relation between health literacy and immunisations routinely offered to pregnant women in Spain.
- Health literacy screening tools were administered to pregnant women to identify health literacy levels. Influenza and pertussis immunisation status was obtained from official vaccination records. Vaccination rates were compared between women with adequate/inadequate health literacy.
- The results highlighted the impact of both low and high health literacy on immunisation decision-making, suggesting the need for careful vaccination support messages from healthcare professionals.
- Although screening tools used in the study have been validated in Spanish-speaking populations in the US, they have not been applied in Spain.
- Further research could consider the development and use of pregnancy-specific scales.

## BACKGROUND

Despite its benefits, influenza vaccine coverage among pregnant women remains low.<sup>1</sup> Some determinants associated with vaccination rejection include insufficient information by professionals and underestimation of infection risks during pregnancy.<sup>2-4</sup>

However, pregnancy is a risk factor for severe influenza, a main reason for hospital admission during gestation.<sup>5</sup> The administration of influenza vaccine to pregnant women would protect immunized mothers and infants. As the safety of the vaccine is well established, its administration is recommended during any trimester of gestation. Globally, influenza vaccination coverage is uneven, ranging from 15-43% in Europe,<sup>6</sup> to 50% in United States (US).<sup>7</sup> In Spain there are no published data on national influenza vaccination coverage among pregnant women; however, our review in 2014-5 reported vaccination rates of 40.5% in pregnant women in our health department.<sup>8</sup>

Vaccination against *Bordetella pertussis* is equally recommended to all pregnant women in Valencia (Spain) since January 2015 due to outbreaks of whooping cough.<sup>9</sup> Women are offered immunisation on the third trimester, ideally between weeks 27-36 of gestation.<sup>6</sup> As with influenza, maternal immunization also benefits newborns.<sup>10</sup> According to WHO, 195,000 children under 5-years died in 2008 of whooping cough. More than 80% of deaths occurred in children younger than 6 months of age. The number of whooping cough cases has increased since 2011 worldwide, including the European Union, and among children and young adults. In Spain, the case incidence has shifted from 739 cases in 2008 to 3,088 cases in 2011, a global rate of 6.73/100,000 hab/year for that year. Additionally, 8 deaths in 2001 were attributed to whooping cough<sup>11</sup>. Of concern, there are currently no published data regarding whooping cough vaccination coverage among pregnant women in

Spain. However, reports on the incidence of whooping cough in 2015 are available indicating 17.99 cases per 100,000 people, with provisional data for 2016 suggesting a marked decline in reported cases.<sup>12</sup>

Among the factors determining vaccination acceptance, health literacy (HL) refers to the knowledge and skills required when making health decisions.<sup>13</sup> Essential HL skills include reading, writing, numeracy, and searching for information.<sup>14,15</sup> Inadequate HL has been associated with poor health outcomes including inadequate self-caring and preventive behaviours such as vaccination.<sup>16</sup> Standardized tools for assessing HL are available, yet mostly in English<sup>17</sup> and focused on US society. European researchers have developed questionnaires,<sup>18</sup> and some tools (Short Assessment of Health Literacy for Spanish Adults (SAHLSA\_50),<sup>19,20</sup> Newest Vital Sign (NVS)<sup>21-24</sup> and Single Item Literacy Screener (SILS)<sup>25</sup> have been validated in Spanish language but not for Spanish citizens.

Although vaccination is especially relevant for pregnant women and wider public health,<sup>26</sup> no studies have been conducted in Spain exploring the relationship between HL and vaccine acceptance. We hypothesise that pregnant women with limited health literacy may be less likely to accept influenza and pertussis vaccinations in Valencia (Spain).

## METHODS

### Study population and sampling criteria

We conducted a cross-sectional study in women who had given birth at *La Ribera* university hospital (*Hospital Universitario de La Ribera*, HULR) in Valencia (Spain). The HULR serves a population of 250,000 citizens and is the only hospital providing maternity services to pregnant women in the area. The influenza and pertussis vaccine policy in the HULR mirrors the national policy, where vaccines are offered systematically, by community midwives and family doctors, to all women free of charge.



1  
2  
3           Immunization campaign in Spain starts in October and concludes in March. In order  
4  
5 to avoid seasonality, we included all women during the study period. Women in their  
6  
7 immediate postpartum period (more than 27 weeks of gestation), between November 2015  
8  
9 and May 2016 were included in the study. We excluded women with impairments, language  
10  
11 barriers or illiteracy. Illiterate women were excluded from the study due to their inability to  
12  
13 complete the health literacy screening tools, which were self-administered. Any help from the  
14  
15 researchers would likely influence the results.<sup>27</sup> Women younger than 18 years were also  
16  
17 excluded from taking part. Prior to data collection, written consent was obtained from each  
18  
19 participant. The study was conducted according to the basic principles of the Declaration of  
20  
21 Helsinki for all medical research and it was approved by the research ethics and research  
22  
23 committee of HULR on 10/07/15.  
24  
25

26           For recruitment, we systematically approached all women admitted to the maternity  
27  
28 ward, every 4 days. To calculate the sample size, we used the SALHSA\_50 tool as a  
29  
30 reference with a cut-off score of 0-37 for inadequate literacy. Accepting an alpha risk of 0.05  
31  
32 and a beta risk of 0.2 in a bilateral contrast, with a common standard deviation of 7.0<sup>28</sup> and a  
33  
34 loss to follow-up rate of 10%, we estimated that 102 participants would be required.  
35  
36  
37  
38  
39

## 40           **Measurements**

41           During the immediate postpartum (24-48 hours after delivery), we collected  
42  
43 sociodemographic, obstetric variables and vaccination status through review medical records,  
44  
45 as well as health literacy from each woman through interview with the researcher in charge.  
46  
47

48           Participants' HL was determined using three screening tools:

49  
50           1) SALHSA\_50: Evaluates word recognition and reading comprehension through a 50-item  
51  
52 tool. Quantitative scores classify individuals with "adequate" (score: 37-50 points) or  
53  
54 "inadequate" HL (score: 0-37 points). The tool has been validated for Hispanics in the US.  
55  
56  
57  
58  
59

1  
2  
3 2) NVS: Evaluates reading and numeracy through six questions about the label of an ice-  
4 cream. The sum score (0–6 points) categorize individuals with high likelihood limited  
5 literacy (score: 0-1 points), possibility of limited literacy (score: 2-3 points), and adequate  
6 literacy (score: 4-6 points). It has been validated for the Hispanic population in the US.<sup>23</sup> It  
7 has high sensitivity, but it can misclassify people with adequate health literacy.<sup>29</sup>  
8  
9

10  
11  
12  
13 3) SILS: It asks patients how often they need help when reading health instructions. The  
14 response is recorded on a 5-point Likert-type scale (1-Never, 2-Rarely, 3-Sometimes, 4-Often  
15 and 5-Always) and categorized as adequate or inadequate. Scores greater than 2 indicate  
16 some difficulty with reading materials.<sup>25</sup>  
17  
18  
19

20  
21  
22 Regarding vaccination, we analysed: 1) influenza or pertussis vaccination status  
23 during pregnancy; 2) if vaccinated, health centre where vaccinated, 3) which healthcare  
24 provider recommended it and; 4) if vaccination rejection, reasons for declining. Vaccination  
25 status was corroborated using the regional Vaccination Registry which records all vaccines  
26 received by patients.<sup>30</sup>  
27  
28  
29  
30  
31  
32

33 Other variables collected through review of medical records included: age, country of  
34 origin, civil status, occupation, education, gestational age, parity, type of delivery, risk factors  
35 during pregnancy (without risk or low risk, pre-gestational or gestational diabetes, thyroid  
36 pathology, preeclampsia, twin pregnancy, and assisted reproduction treatment).  
37  
38  
39  
40  
41  
42  
43

#### 44 **Statistical analysis**

45  
46 In the univariate analysis, quantitative variables were described with means and standard  
47 deviation or median and interquartile range, depending on the normality of their distribution.  
48 The Kolmogorov-Smirnov goodness-of-fit test was used to determine the normality of  
49 distributions. In the bivariate analysis, the Chi-square test was used between the qualitative  
50 variables and the vaccination status. To compare the medical risk factors during pregnancy  
51  
52  
53  
54  
55  
56  
57  
58  
59  
60

1  
2  
3 related to vaccination, odds ratio (OR) with a 95% Confidence Interval (95% CI) were  
4  
5 calculated.

6  
7 The non-parametric Mann-Whitney U test was used when the normality hypothesis was  
8  
9 rejected when comparing independent samples with the categorised values of NVS and  
10  
11 SAHLSA\_50 and vaccination acceptance. To identify the variables explaining the level of  
12  
13 HL according to each screening tool a series of multivariate analyses were conducted. The  
14  
15 multivariate lineal regression analysis (Wald statistic) was used regarding the explanatory  
16  
17 covariates for the quantitative tools NVS and SALHSA\_50, and a multinomial model was  
18  
19 constructed for the qualitative scale SILS. The level of statistical significance was set at 0.05.  
20  
21 The statistical package SPSS for Windows, V.22.0 (IBM Corp. Armonk, NY: IBM Corp)  
22  
23 was used for data analysis.  
24  
25  
26  
27

## 28 **RESULTS**

29  
30  
31 Out of a total of 168 women who initially consented to be included in the study 49 were  
32  
33 excluded (29%) for the following reasons: 10 (20%) were breastfeeding, 16 (33%) had  
34  
35 language barriers, 16 (33%) were busy, 4 (8%) were absent from their room and 3 (6%) were  
36  
37 unwell. Therefore, the study sample comprised 119 participants (71%).

38  
39 **Table 1** presents sociodemographic characteristics of participants. The mean age was  
40  
41  $32.3 \pm 5.5$  years, with  $29.5 \pm 5.4$  as mean age for the first pregnancy. 52% (62) were  
42  
43 primiparous. The mean gestational age at delivery was  $39.1 \pm 1.5$ , with 95% (113) full term  
44  
45 deliveries (37-42 weeks).  
46  
47  
48  
49  
50  
51  
52  
53  
54  
55  
56  
57  
58  
59  
60

**Table 1. Socio-demographic, clinical and obstetric characteristics of the sample by vaccine influenza status (n=119)**

|                                       |                          | Total row | Unvaccinated<br>n=57 |    | Vaccinated<br>n=62 |     | <sup>a</sup> p-value |
|---------------------------------------|--------------------------|-----------|----------------------|----|--------------------|-----|----------------------|
|                                       |                          | N         | N                    | %  | N                  | %   |                      |
| Civil Status                          | With partner             | 48        | 20                   | 35 | 28                 | 45  | 0.458                |
|                                       | Married/civil partner    | 67        | 35                   | 61 | 32                 | 52  |                      |
|                                       | Separated/Divorced       | 4         | 2                    | 4  | 2                  | 3   |                      |
| Level of Education                    | Primary school           | 40        | 20                   | 36 | 20                 | 32  | 0.296                |
|                                       | Secondary school         | 42        | 19                   | 33 | 23                 | 37  |                      |
|                                       | University               | 37        | 18                   | 44 | 19                 | 31  |                      |
| Employment Status                     | I                        | 13        | 9                    | 16 | 4                  | 6   | 0.083                |
|                                       | II                       | 66        | 35                   | 61 | 31                 | 50  |                      |
|                                       | III                      | 2         | 0                    | 0  | 2                  | 3   |                      |
|                                       | IV                       | 1         | 0                    | 0  | 1                  | 2   |                      |
|                                       | V                        | 37        | 13                   | 23 | 24                 | 39  |                      |
| Country of Origin                     | Spain                    | 104       | 51                   | 89 | 53                 | 85  | 0.261                |
|                                       | Another EU country       | 8         | 5                    | 9  | 3                  | 5   |                      |
|                                       | Non-EU country           | 1         | 0                    | 0  | 1                  | 2   |                      |
|                                       | Central-South America    | 6         | 1                    | 2  | 5                  | 8   |                      |
| Pertussis vaccine                     | Unvaccinated             | 7         | 7                    | 12 | 0                  | 0   | 0.269                |
|                                       | Vaccinated               | 112       | 50                   | 88 | 62                 | 100 |                      |
| Medical Risk Factors During Pregnancy | None/Low risk            | 92        | 45                   | 79 | 47                 | 76  | 0.570                |
|                                       | Pre/Gest Diabetes        | 7         | 2                    | 3  | 5                  | 8   |                      |
|                                       | Thyroid pathology        | 7         | 5                    | 9  | 2                  | 3   |                      |
|                                       | Preeclampsia             | 1         | 0                    | 0  | 1                  | 2   |                      |
|                                       | Twin pregnancy           | 3         | 1                    | 2  | 2                  | 3   |                      |
|                                       | ART                      | 9         | 4                    | 7  | 5                  | 8   |                      |
| NVS categories                        | Inadequate (0-1 points)  | 13        | 6                    | 10 | 7                  | 11  | 0.219                |
|                                       | Limited (2-3 points)     | 38        | 14                   | 25 | 24                 | 39  |                      |
|                                       | Adequate (4-6 points)    | 68        | 37                   | 65 | 31                 | 50  |                      |
| SAHLSA categories                     | Inadequate (0-37 points) | 17        | 6                    | 10 | 11                 | 18  | 0.261                |
|                                       | Adequate (38-50 points)  | 102       | 51                   | 89 | 51                 | 82  |                      |
| SILS categories                       | Never                    | 29        | 13                   | 23 | 16                 | 26  | 0.947                |
|                                       | Rarely                   | 34        | 17                   | 30 | 17                 | 27  |                      |
|                                       | Sometimes                | 33        | 17                   | 30 | 16                 | 26  |                      |
|                                       | Often                    | 8         | 4                    | 7  | 4                  | 6   |                      |
|                                       | Always                   | 15        | 6                    | 10 | 9                  | 14  |                      |

<sup>a</sup>Chi-square; I: self-employed, higher professional or managerial employment; II: employee; III: student; IV: stay-at-home mother; V: unemployed; EU= European Union; ART= Assisted Reproduction Treatment.

The information and recommendation about vaccination came mainly from their midwives (94%), in 4% from the family doctor and 2% of women did not provide any information. As we wanted to be as sure as possible of the vaccination status of each participant, we validated the vaccination status reported by the participants with the immunization status recorded in the official electronic immunization registry. We corroborated that all women without immunisation recorded on the electronic record had not been vaccinated.

Regarding HL screening tools, the correlation between SAHLSA\_50 and SILS was moderate, inversely proportional and significant ( $r = -0.251$ ,  $p = 0.007$ ). The correlation between NVS and SAHLSA\_50 was moderate and significant ( $r = 0.349$ ,  $p < 0.001$ ). The correlation between NVS and SILS was moderate, inversely proportional and also significant ( $r = -0.307$ ,  $p = 0.001$ ).

We also analysed the influence of participants' education on HL level and the scales of assessment. Higher education was directly related to higher SAHLSA\_50 ( $r = 0.244$ ,  $p < 0.001$ ) and NVS ( $r = 0.366$ ,  $p = 0.002$ ) scores. This relationship however was not present in the SILS scale.

### **Vaccination status**

17% (20/62) of women had been vaccinated against influenza prior to pregnancy. Gestational influenza vaccination coverage was 52% (62/119). The vaccine was administered to 5% (4/62) of women by week 20, and to 16% (10/62) in the last weeks of gestation (more than 36 weeks). Concerning pertussis vaccine, 94% (112/119) of women had it during pregnancy, with 86% (96/112) vaccinated between weeks 27-32 of gestation. All women vaccinated against influenza were simultaneously vaccinated against whooping cough. There were no

1  
2  
3 significant differences in sociodemographic or obstetric characteristics between pregnant  
4 vaccination status for influenza or pertussis ( $p=0.15$  and  $p=0.35$ , respectively) [data not  
5 shown].  
6  
7

8  
9 The reasons for rejection of women who were not vaccinated against influenza during  
10 pregnancy (57) are shown in **Figure 1**. 25% (14/57) felt that the vaccine was unnecessary,  
11 23% (13/57) claimed to have received insufficient information from health professionals and  
12 14% (8/57) claimed that they had never been infected. The reasons reported by women  
13 declining vaccination against pertussis were lack of information from health professionals (4  
14 [57%]) and lack of any prenatal care (3 [43%]).  
15  
16  
17  
18  
19  
20  
21  
22  
23  
24

25 **Figure 1 about here**  
26  
27  
28

### 29 **Health literacy**

30  
31 In the NVS scale we obtained an average score of  $3.7 \pm 1.6$  with values between 0 and 6.  
32 These scores were categorized as inadequate [13% (16/119)], limited [30% (36/119)] and  
33 adequate HL [56% (67)]. SAHLSA\_50 scores were  $44.1 \pm 4.4$  out of 50. An 86% (102/119)  
34 of women had adequate HL levels (SAHLSA-50 score > 37). According to the SILS, 24%  
35 (29/119) women replied 'never' needing help when reading information, 29% (35/119)  
36 'rarely', 27% (32/119) 'sometimes' and only 6% (7/119) replied 'often' and 13% (16/119)  
37 replied 'always'.  
38  
39  
40  
41  
42  
43  
44  
45

46 To identify variables explaining HL levels according to each screening tool  
47 multivariate analyses were conducted. Multivariate lineal regression was used regarding the  
48 explanatory covariates for quantitative tools NVS and SALHSA\_50. For these, the level of  
49 education was found to be statistically significant (NVS [adjusted R-squared=0.258;  
50  
51  
52  
53  
54  
55  
56  
57  
58  
59  
60

1  
2  
3 p=0.001] and SALHSA\_50 [adjusted R-squared=0.220; p=0.014]). A multinomial model was  
4  
5 constructed for the qualitative scale SILS, observing no statistically significant differences.  
6

7 There were no differences in NVS and SILS scores between women who declined and  
8  
9 those who accepted influenza vaccination (Mann-Whitney U test, p=0.320 and p=0.942  
10  
11 respectively). However, for SAHLSA\_50 (Median=44.5; IQR=5.0 vs 45.0; IQR=5.5) the  
12  
13 differences were statistically significant (Mann-Whitney U test, p=0.019) (See **Figure 2**).  
14  
15

16  
17  
18 **Figure 2 about here**  
19  
20  
21

22 Later, scores from the quantitative health literacy screening tools (NVS,  
23  
24 SALHSA\_50) were distributed in quartiles (**Figure 3**). For the NVS scale we found no  
25  
26 statistically significant difference between women who had accepted or declined vaccination  
27  
28 (p=0.532). However, such difference was seen when using the SALHSA\_50 tool (Kruskal-  
29  
30 Wallis test, p=0.022). The median number of women vaccinated in the bottom quartile was 8  
31  
32 (95% CI: 7.0-9.0) versus 24 (95% CI: 23.0-25.0) in the top quartile.  
33  
34

35 We were interested in examining the characteristics of the women who were excluded  
36  
37 from the study (49). We conducted an analysis of missing values for the three health literacy  
38  
39 screening tools using the multiple imputation chained equations method.<sup>31</sup> Again, for the  
40  
41 NVS scale we found no statistically significant difference between women who had accepted  
42  
43 or declined vaccination (p=0.372) and, instead, such difference was seen when using the  
44  
45 SALHSA\_50 tool (Kruskal-Wallis test, p=0.003). The median number of women vaccinated  
46  
47 in the bottom quartile was 11 (95% CI: 9.0-12.0) vs 28 (95% CI: 27.0-29.0) in the top  
48  
49 quartile.  
50  
51

52  
53  
54 **Figure 3 about here**  
55  
56  
57

1  
2  
3  
4  
5 Regarding the NVS, scores between pertussis-vaccinated and unvaccinated women were  
6 similar (Median= 4.0; IQR=0.0 vs Median=4.0; IQR=2.75), like the SAHLSA\_50 scale  
7 (Median= 45.0; IQR=0.0 vs Median= 45.0; IQR=5.0). We also did not find any difference  
8 with the results from the SILS tool.  
9  
10  
11  
12

## 13 14 15 **DISCUSSION**

16  
17 Vaccination is an essential public health intervention. We focused on pregnant women, an  
18 especially vulnerable population, and studied the acceptance of two vaccines underutilised in  
19 our community.<sup>8</sup> Few studies evaluating HL and vaccination have been conducted thus far  
20 and, up to now, none had focused on pregnant women.  
21  
22  
23  
24  
25

26 In our study, influenza vaccination did not reach recommended levels although  
27 coverage slightly exceeded Australian<sup>32</sup> but not US rates.<sup>33</sup> In Valencia coverage has  
28 progressively improved from 2011 (8.5%) to 2015 (34.4%).<sup>8</sup> Regarding pertussis, the 97%  
29 vaccination rate improves on Belgian (39%)<sup>34</sup> or UK (70%)<sup>6</sup> rates. We believe that fear to  
30 pertussis, influenced by mass media<sup>35</sup> could explain such high vaccination prevalence. The  
31 disparity between pertussis and influenza immunization rates has not been previously  
32 addressed.<sup>6</sup> The disinterest from health professionals together with maternal perceptions that  
33 influenza vaccine was unnecessary were the most frequently cited causes of vaccine  
34 rejection, in agreement with prior studies.<sup>5-8,36</sup> This position obviously ignores the benefits of  
35 acquired immunity for the newborn, which could reduce perinatal infections.<sup>37</sup>  
36  
37  
38  
39  
40  
41  
42  
43  
44  
45  
46  
47

48 We found that NVS classified 58% of participants with adequate HL. However, this  
49 figure increased up to 89% if SAHLSA\_50 was used. Currently, there are no publications  
50 comparing both scales simultaneously in the same population. Such discrepancy between  
51 screening tools could be of much relevance as, of the tools pragmatically chosen for our  
52  
53  
54  
55  
56  
57  
58  
59  
60



1  
2  
3 research, only SALHSA\_50 was predictive of vaccination in pregnant women. However,  
4 women with high SALHSA\_50 scores were more likely to decline influenza vaccination,  
5 perhaps due to pre-conceived ideas; it might also be that women with high HL have more  
6 abilities to look for information on the internet and are deceived by the information they  
7 found and as such decline vaccination,<sup>38</sup> or failures by professionals to adequately inform  
8 them.<sup>37,39,40</sup> These results diverge from current evidence<sup>4</sup> in this group of women possibly  
9 highly involved in their health care, as already explored.<sup>41</sup>

10  
11  
12  
13  
14  
15  
16  
17  
18 As perhaps expected, HL screening results were directly related to the education of  
19 participants and thus, a higher level of education was associated with higher HL.  
20 Interestingly, other authors have reported that a higher level of education is associated with  
21 higher rates of vaccine rejection and hesitation.<sup>36,42</sup> In fact, it would appear that the emerging  
22 relationship between HL and vaccination described by those authors may be represented as  
23 an 'inverted U' shape' (i.e., high and low HL levels equally associated with low vaccination).  
24  
25  
26  
27  
28  
29  
30

31 The analysis of missing values would help resolve some of the challenges originated  
32 from the incomplete responses. If cases with missing data were to be systematically different  
33 to cases with complete information, then results could be equivocal.<sup>31</sup> In our case, however,  
34 the analysis of missing values did not produce different results to the original analysis  
35 conducted without imputed values.  
36  
37  
38  
39  
40

41 Our study presents limitations. Although there are approximately 51 HL tools  
42 available,<sup>17</sup> experiences in Spain with these instruments have been few and limited to the  
43 Health Literacy Survey - European Union<sup>43</sup> or the eHealth Literacy (eHL)<sup>44</sup> tools. In addition,  
44 none of these tools have been validated in Spain, yet they have been so in Spanish-speaking  
45 US populations. Moreover, as there are no scales specifically focused on pregnant women,  
46 our questionnaire selection was eminently pragmatic and based on ease of use (SILS),  
47 robustness (SAHLSA\_50) and reliability (NVS). Additionally, the routine use of HL  
48  
49  
50  
51  
52  
53  
54  
55  
56  
57  
58  
59  
60

1  
2  
3 screening tools remains nevertheless controversial, as routine screening has shown no  
4  
5 benefits yet could have undesirable effects.<sup>45</sup>  
6

7  
8 Decisions related to vaccination may be influenced by the information provided, the  
9  
10 communication approaches and attitudes of by health professionals.<sup>36,37</sup> Since there is  
11  
12 currently no standardized approach to determine the abilities that pregnant women have to  
13  
14 make effective use of the information provided, we hypothesise that information offered to  
15  
16 each woman will be more or less similar and, therefore, women with low HL may be more  
17  
18 likely to make suboptimal decisions because of such deficit. Logically, this does not consider  
19  
20 efforts that professionals may make to compensate for any difficulties in understanding.  
21  
22 Although exploring such efforts was outside the remit of our work, it would be interesting to  
23  
24 investigate this aspect in future studies, together with any supporting materials used by  
25  
26 professionals.  
27  
28  
29  
30

### 31 **CONCLUSION**

32  
33 Vaccination is an essential public health measure and pregnant women can particularly  
34  
35 benefit from this intervention. Identifying determinants of vaccination such as health literacy  
36  
37 would facilitate an adequate use of resources to encourage shared decision-making,  
38  
39 ultimately resulting in optimal vaccination rates. Our findings suggesting a relation between  
40  
41 high health literacy and rejection of vaccination encourage further research to identify and  
42  
43 describe the factors involved in such relation and implement mitigating initiatives.  
44  
45  
46  
47  
48  
49  
50  
51  
52  
53  
54  
55  
56  
57  
58  
59  
60

## WHAT IS ALREADY KNOWN ON THE SUBJECT

- Vaccination coverage against influenza and whooping cough among pregnant women worldwide remains suboptimal.
- Health literacy influences healthcare decisions including vaccination.
- There is a lack of studies conducted in Spain exploring the relationship between HL and vaccine acceptance among pregnant women.

## WHAT THIS STUDY ADDS

- Only half of pregnant women in Spain accepted influenza vaccination.
- Women with high health literacy were more likely to reject vaccination.
- Provision of information about immunisation together with vaccination narratives tailored to health literacy levels of women remain unresolved matters.

## **FUNDING**

This work was supported by the Universidad Católica de Valencia “San Vicente Mártir” (Spain) through a competitive grant call [PRUCV/2015/639]. ECS is affiliated with the National Institute for Health Research (NIHR) Health Protection Research Unit (HPRU) in Healthcare Associated Infection and Antimicrobial Resistance at Imperial College London in partnership with Public Health England (PHE), and the NIHR Imperial Patient Safety Translational Research Centre. ECS has received an Early Career Research Fellowship from the Antimicrobial Research Collaborative at Imperial College London and acknowledges the support of the Florence Nightingale Foundation. The views expressed are those of the authors and not necessarily those of the NHS, the NIHR, the Department of Health, or Public Health England. The funders had no role in study design; collection, analysis, and interpretation of data; writing the report; and the decision to submit the report for publication.

## **COMPETING INTERESTS**

None declared.

## **AUTHOR CONTRIBUTION**

ECS RVC conceptualized and designed the study, RVC FSV collected data, ECS RVC FSV carried out the data analyses, ECS RVC ENI JDD FSV drafted the initial manuscript, ECS RVC FSV ENI JDD reviewed and revised the manuscript. All authors read and approved the final manuscript.

## **DATA SHARING**

No additional data are available.

## **ETHICAL APPROVAL**

The study was conducted in compliance with the Declaration of Helsinki and it was approved by the research ethics and research committee of HULR on 10/07/15.

## **ACKNOWLEDGEMENTS**

We are grateful to the Universidad Católica de Valencia and to the HULR for their support and participation in this project, and to all the women who have also taken part. We also thank Professor Daniel Lee for authorising the use of the SALHSA\_50 tool in our research.

**REFERENCES**

1. Fiore AE, Uyeki TM, Broder K, et al. Prevention and control of influenza with vaccines: recommendations of the Advisory Committee on Immunization Practices (ACIP), 2010. *MMWR Recomm Rep*. 2010;59(RR-8):1-62. doi:10.1111/j.1600-6143.2011.03793.x.
2. Regan AK, Mak DB, Hauck YL, Gibbs R, Tracey L, Effler P V. Trends in seasonal influenza vaccine uptake during pregnancy in Western Australia: Implications for midwives. *Women and Birth*. 2016;29(5):423-429. doi:10.1016/j.wombi.2016.01.009.
3. Tamma PD, Ault KA, del Rio C, Steinhoff MC, Halsey NA, Omer SB. Safety of influenza vaccination during pregnancy. *Am J Obstet Gynecol*. 2009;201(6):547-552. [http://www.ajog.org/article/S0002-9378\(09\)01108-9/pdf](http://www.ajog.org/article/S0002-9378(09)01108-9/pdf).
4. Yudin MH, Salaripour M, Sgro MD. Pregnant Women's Knowledge of Influenza and the Use and Safety of the Influenza Vaccine During Pregnancy. *J Obstet Gynaecol Canada*. 2009;31(2):120-125. doi:10.1016/S1701-2163(16)34095-6.
5. Panda B, Stiller R, Panda A. Influenza vaccination during pregnancy and factors for lacking compliance with current CDC guidelines. *J Matern Fetal Neonatal Med*. 2011;24(3):402-406. doi:10.3109/14767058.2010.497882.
6. Laenen J, Roelants M, Devlieger R, Vandermeulen C. Influenza and pertussis vaccination coverage in pregnant women. *Vaccine*. 2015;33(18):2125-2131. doi:10.1016/j.vaccine.2015.03.020.
7. Ding H, Black CL, Ball S, et al. Influenza Vaccination Coverage Among Pregnant Women--United States, 2014-15 Influenza Season. *MMWR Morb Mortal Wkly Rep*.

- 2015;64(36):1000-1005. doi:10.15585/mmwr.mm6436a2.
8. Vila-Candel R, Navarro-Illana P, Navarro-Illana E, et al. Determinants of seasonal influenza vaccination in pregnant women in Valencia, Spain. *BMC Public Health*. 2016;16:1173. doi:10.1186/s12889-016-3823-1.
9. Torres J, Godoy P, Artigues A, et al. [Outbreak of whooping cough with a high attack rate in well-vaccinated children and adolescents]. *Enfermedades Infecc y Microbiol clínica*. 2011;29(8):564-567. doi:10.1016/j.eimc.2011.04.005.
10. Amirthalingam G, Andrews N, Campbell H, et al. Effectiveness of maternal pertussis vaccination in England: An observational study. *Lancet*. 2014;384(9953):1521-1528. doi:10.1016/S0140-6736(14)60686-3.
11. WHO. Pertussis vaccines: WHO position paper, August 2015-Recommendations. *Vaccine*. 2016;34(12):1423-1425. doi:10.1016/j.vaccine.2015.10.136.
12. Situación de la Tos ferina en España, 2005-2016. Centro Nacional de Epidemiología. Ministerio de Economía, Industria y Competitividad. [http://www.isciii.es/ISCIII/es/contenidos/fd-servicios-cientifico-tecnicos/fd-vigilancias-alertas/fd-enfermedades/pdf\\_2016/INFORME\\_Tos\\_ferina\\_Espana\\_2005-2016.pdf](http://www.isciii.es/ISCIII/es/contenidos/fd-servicios-cientifico-tecnicos/fd-vigilancias-alertas/fd-enfermedades/pdf_2016/INFORME_Tos_ferina_Espana_2005-2016.pdf). Published 2016. Accessed October 20, 2017.
13. Sørensen K, Van den Broucke S, Fullam J, et al. Health literacy and public health: A systematic review and integration of definitions and models. *BMC Public Health*. 2012;12(1):80. doi:10.1186/1471-2458-12-80.
14. Baker DW. The meaning and the measure of health literacy. *J Gen Intern Med*. 2006;21(8):878-883. doi:10.1111/j.1525-1497.2006.00540.x.
15. Nutbeam D. Health literacy as a public goal: a challenge for contemporary health education and communication strategies into the 21st century. *Heal Promot Int*. 2000;15(3):259-267. doi:10.1093/heapro/15.3.259.

- 1  
2  
3 16. Heijmans M, Uiters E, Rose T, et al. *Study on Sound Evidence for a Better*  
4 *Understanding of Health Literacy in the European Union.*; 2015. doi:10.2818/150402.  
5  
6  
7 17. Haun JN, Valerio MA, McCormack LA, Sørensen K, Paasche-Orlow MK. Health  
8 literacy measurement: An inventory and descriptive summary of 51 instruments. *J*  
9 *Health Commun.* 2014;19:302-333. doi:10.1080/10810730.2014.936571.  
10  
11  
12 18. Sørensen K, Pelikan JM, Röthlin F, et al. Health literacy in Europe: comparative  
13 results of the European health literacy survey (HLS-EU). *Eur J Public Health.*  
14 2015;25(6):1053-1058. doi:10.1093/eurpub/ckv043.  
15  
16  
17 19. Lee S-YD, Stucky BD, Lee JY, Rozier RG, Bender DE. Short Assessment of Health  
18 Literacy-Spanish and English: a comparable test of health literacy for Spanish and  
19 English speakers. *Health Serv Res.* 2010;45(4):1105-1120. doi:10.1111/j.1475-  
20 6773.2010.01119.x.  
21  
22  
23 20. Vilca Yengle LM, Campins Martí M, Cabero Roura L, et al. [Influenza vaccination in  
24 pregnant women. Coverage, practices and knowledge among obstetricians]. *Med Clin*  
25 *(Barc).* 2010;134(4):146-151.  
26  
27  
28 21. Castro-Sánchez E, Chang PWS, Vila-Candel R, Escobedo AA, Holmes AH. Health  
29 literacy and infectious diseases: why does it matter? *Int J Infect Dis.* 2016;43:103-110.  
30 doi:10.1016/j.ijid.2015.12.019.  
31  
32  
33 22. Morrison AK, Schapira MM, Hoffmann RG, Brousseau DC. Measuring health literacy  
34 in caregivers of children: a comparison of the newest vital sign and S-TOFHLA. *Clin*  
35 *Pediatr (Phila).* 2014;53(13):1264-1270. doi:10.1177/0009922814541674.  
36  
37  
38 23. Warsh J, Chari R, Badaczewski A, Hossain J, Sharif I. Can the Newest Vital Sign be  
39 used to assess health literacy in children and adolescents? *Clin Pediatr (Phila).*  
40 2014;53(2):141-144. doi:10.1177/0009922813504025.  
41  
42  
43 24. Weiss BD, Mays MZ, Martz W, et al. Quick assessment of literacy in primary care:  
44  
45  
46  
47  
48  
49  
50  
51  
52  
53  
54  
55  
56  
57  
58  
59  
60



- 1  
2  
3 The newest vital sign. *Ann Fam Med*. 2005;3(6):514-522. doi:10.1370/afm.405.  
4  
5 25. Morris NS, MacLean CD, Chew LD, Littenberg B. The Single Item Literacy Screener:  
6  
7 evaluation of a brief instrument to identify limited reading ability. *BMC Fam Pract*.  
8  
9 2006;7:21. doi:10.1186/1471-2296-7-21.  
10  
11 26. Mak TK, Mangtani P, Leese J, Watson JM, Pfeifer D. Influenza vaccination in  
12  
13 pregnancy: current evidence and selected national policies. *Lancet Infect Dis*.  
14  
15 2008;8(1):44-52.  
16  
17 27. Davis RE, Couper MP, Janz NK, Caldwell CH, Resnicow K. Interviewer effects in  
18  
19 public health surveys. *Health Educ Res*. 2010;25(1):14-26.  
20  
21 <http://dx.doi.org/10.1093/her/cyp046>.  
22  
23 28. Padilla-Santoyo P, Vilchez-Román C. Psychometric properties of the SAHLSA-50, a  
24  
25 standardized test to evaluate the health literacy. *Rev Per Obs Enf*. 2008;4(2):90-95.  
26  
27 29. Delanoë A, Lépine J, Leiva Portocarrero ME, et al. Health literacy in pregnant women  
28  
29 facing prenatal screening may explain their intention to use a patient decision aid: a  
30  
31 short report. *BMC Res Notes*. 2016;9(1):339. doi:10.1186/s13104-016-2141-0.  
32  
33 30. Vila-Candel R, Navarro-Illana P, Navarro-Illana E, et al. Determinants of seasonal  
34  
35 influenza vaccination in pregnant women in Valencia, Spain. *BMC Public Health*.  
36  
37 2016;16(1):1173. doi:10.1186/s12889-016-3823-1.  
38  
39 31. Hayati Rezvan P, Lee KJ, Simpson JA. The rise of multiple imputation: a review of  
40  
41 the reporting and implementation of the method in medical research. *BMC Med Res*  
42  
43 *Methodol*. 2015;15(1):30. doi:10.1186/s12874-015-0022-1.  
44  
45 32. Maher L, Hope K, Torvaldsen S, et al. Influenza vaccination during pregnancy:  
46  
47 Coverage rates and influencing factors in two urban districts in Sydney. *Vaccine*.  
48  
49 2013;31(47):5557-5564. doi:10.1016/j.vaccine.2013.08.081.  
50  
51 33. Henninger M. Trends in Influenza Vaccine Coverage in Pregnant Women, 2008 to  
52  
53  
54  
55  
56  
57  
58  
59  
60

2012. *Perm J*. 2013;17(2):31-36. doi:10.7812/TPP/12-115.
34. Maertens K, Caboré RN, Huygen K, Hens N, Van Damme P, Leuridan E. Pertussis vaccination during pregnancy in Belgium: Results of a prospective controlled cohort study. *Vaccine*. 2016;34(1):142-150. doi:10.1016/j.vaccine.2015.10.100.
35. Campins M, Moreno-Perez D, Gil-de Miguel A, et al. [Whooping cough in Spain. Current epidemiology, prevention and control strategies. Recommendations by the Pertussis Working Group]. *Enferm Infecc Microbiol Clin*. 2013;31(4):240-253. doi:10.1016/j.eimc.2012.12.011.
36. Biasio LR. Vaccine hesitancy and health literacy. *Hum Vaccin Immunother*. 2017;13(3):701-702. doi:10.1080/21645515.2016.1243633.
37. Lorini C, Santomauro F, Donzellini M, et al. Health literacy and vaccination: A systematic review. *Hum Vaccin Immunother*. October 2017:00-00. doi:10.1080/21645515.2017.1392423.
38. Stahl JP, Cohen R, Denis F, et al. The impact of the web and social networks on vaccination. New challenges and opportunities offered to fight against vaccine hesitancy. *Med Mal Infect*. 2016;46(3):117-122. doi:10.1016/j.medmal.2016.02.002.
39. Nicolai LM, Pettigrew MM. The Role of Cognitive Bias in Suboptimal HPV Vaccine Uptake. *Pediatrics*. 2016;138(4):e20161537.
40. Yaqub O, Castle-Clarke S, Sevdalis N, Chataway J. Attitudes to vaccination: A critical review. *Soc Sci Med*. 2014;112:1-11. doi:10.1016/j.socscimed.2014.04.018.
41. Fadda M, Depping MK, Schulz PJ. Addressing issues of vaccination literacy and psychological empowerment in the measles-mumps-rubella (MMR) vaccination decision-making: a qualitative study. *BMC Public Health*. 2015;15:836. doi:10.1186/s12889-015-2200-9.
42. Hak E, Sch??nbeck Y, De Melker H, Van Essen GA, Sanders EAM. Negative attitude

- 1  
2  
3 of highly educated parents and health care workers towards future vaccinations in the  
4 Dutch childhood vaccination program. *Vaccine*. 2005;23(24):3103-3107.  
5 doi:10.1016/j.vaccine.2005.01.074.  
6  
7  
8  
9 43. Sorensen K, Van den Broucke S, Pelikan JM, et al. Measuring health literacy in  
10 populations: illuminating the design and development process of the European Health  
11 Literacy Survey Questionnaire (HLS-EU-Q). *BMC Public Health*. 2013;13(1):948.  
12 doi:10.1186/1471-2458-13-948.  
13  
14  
15  
16  
17 44. Paramio Perez G, Almagro BJ, Hernando Gomez A, Agueda Gomez JI. [Validation  
18 of the eHealth Literacy Scale (eHEALS) in Spanish University Students]. *Rev Esp*  
19 *Salud Publica*. 2015;89(3):329-338. doi:10.4321/s1135-57272015000300010.  
20  
21  
22  
23  
24 45. Dickens C. Health Literacy and Nursing. *AJN, Am J Nurs*. 2013;113(6):52-57.  
25 doi:10.1097/01.NAJ.0000431271.83277.2f.  
26  
27  
28  
29  
30  
31  
32  
33  
34  
35  
36  
37  
38  
39  
40  
41  
42  
43  
44  
45  
46  
47  
48  
49  
50  
51  
52  
53  
54  
55  
56  
57  
58  
59  
60

1  
2  
3  
4  
5  
6  
7  
8  
9  
10  
11 **FIGURE TITLES**  
12

13 **Figure 1. Reasons given by participants to decline influenza vaccination**  
14

15  
16  
17  
18 **Figure 2. Relationship between acceptance of influenza vaccination and SAHLSA\_50**  
19  
20 **scale (N=119)**  
21  
22

23  
24 **Figure 3. Relationship between acceptance of influenza vaccination and SAHLSA\_50**  
25  
26 **scale distribution by quartiles (N=119)**  
27  
28  
29  
30  
31  
32  
33  
34  
35  
36  
37  
38  
39  
40  
41  
42  
43  
44  
45  
46  
47  
48  
49  
50  
51  
52  
53  
54  
55  
56  
57  
58  
59  
60

1  
2  
3  
4  
5  
6  
7  
8  
9  
10  
11  
12  
13  
14  
15  
16  
17  
18  
19  
20  
21  
22  
23  
24  
25  
26  
27  
28  
29  
30  
31  
32  
33  
34  
35  
36  
37  
38  
39  
40  
41  
42  
43  
44  
45  
46  
47  
48  
49  
50  
51  
52  
53  
54  
55  
56  
57  
58  
59  
60

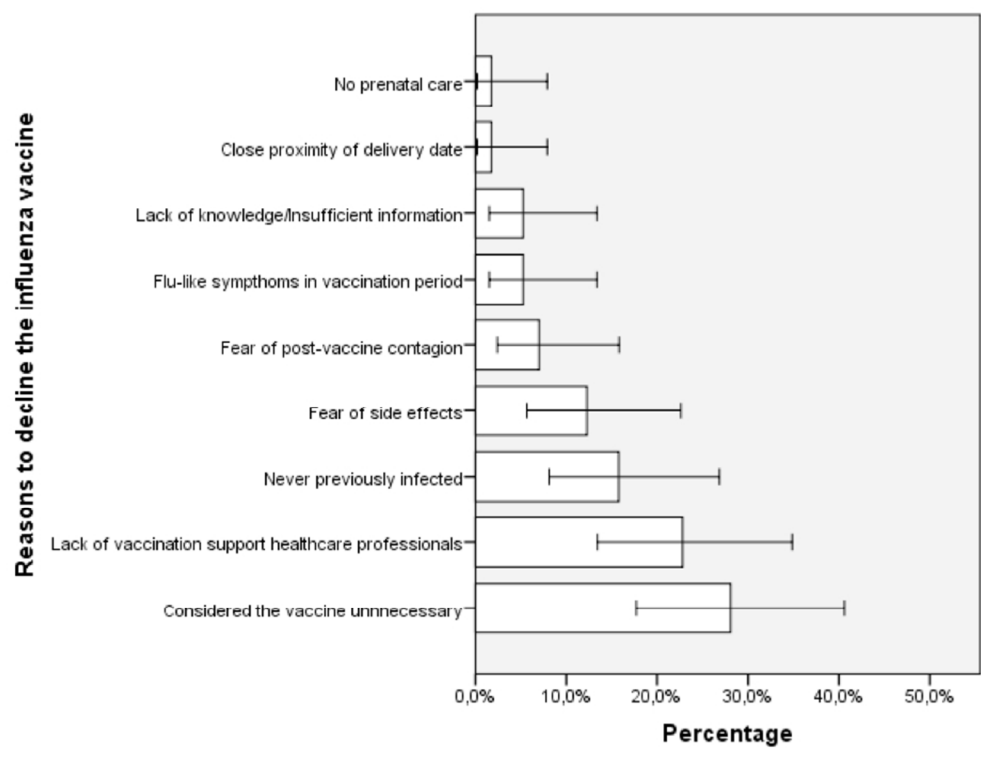

Error bars: % confidence interval

Reasons given by participants to decline influenza vaccination

159x127mm (150 x 150 DPI)

View only

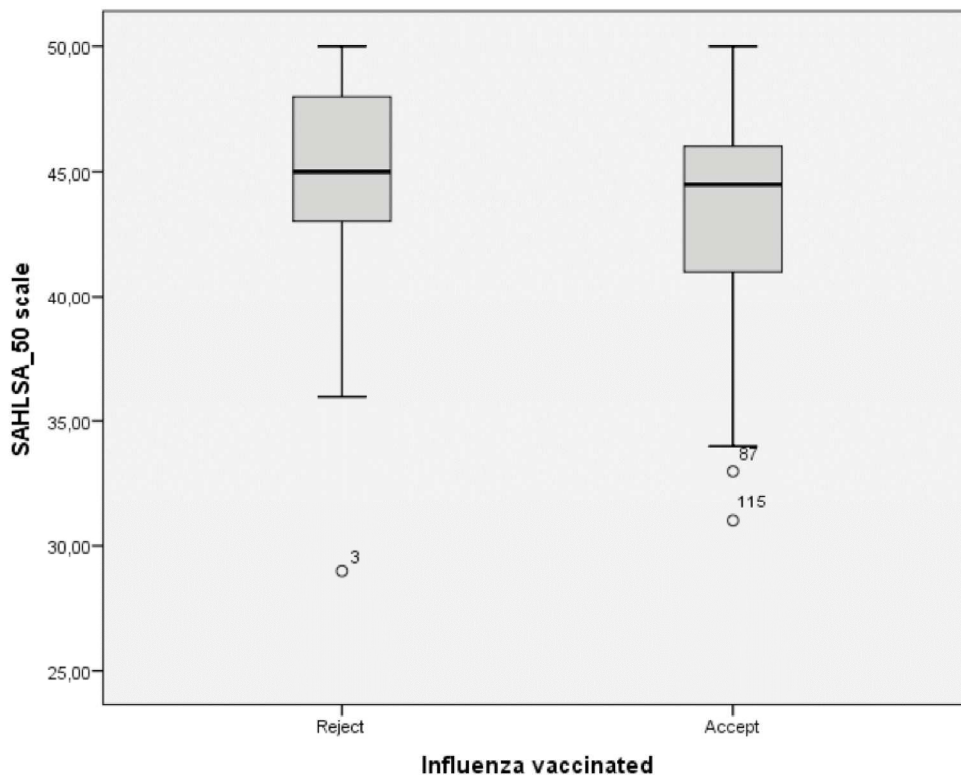

Relationship between acceptance of influenza vaccination and SAHLSA\_50 scale (N=119)

497x397mm (96 x 96 DPI)

View only

1  
2  
3  
4  
5  
6  
7  
8  
9  
10  
11  
12  
13  
14  
15  
16  
17  
18  
19  
20  
21  
22  
23  
24  
25  
26  
27  
28  
29  
30  
31  
32  
33  
34  
35  
36  
37  
38  
39  
40  
41  
42  
43  
44  
45  
46  
47  
48  
49  
50  
51  
52  
53  
54  
55  
56  
57  
58  
59  
60

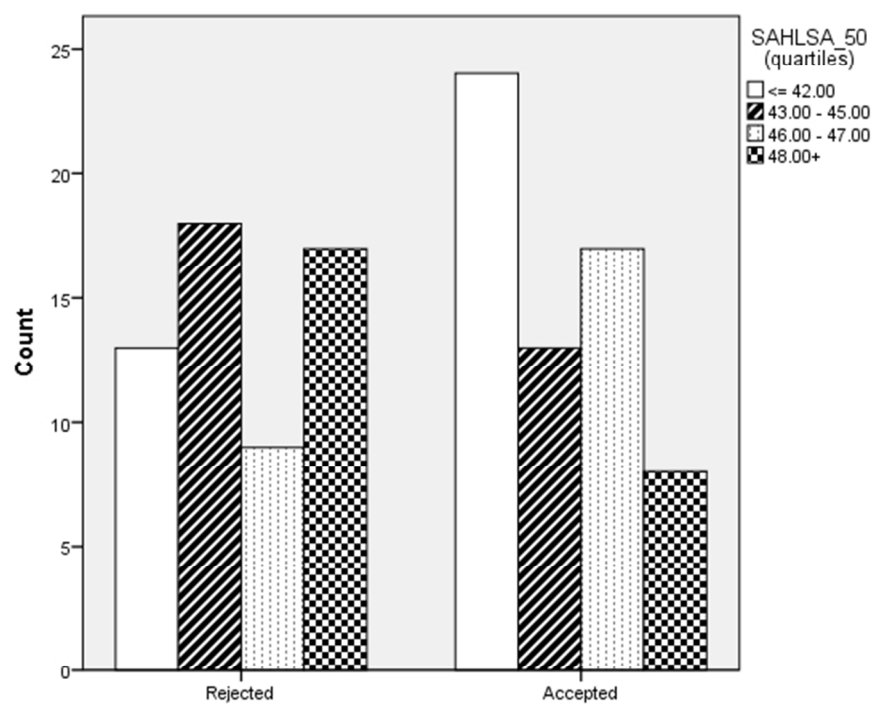

Relationship between acceptance of influenza vaccination and SAHLSA\_50 scale distribution by quartiles (N=119)

165x132mm (96 x 96 DPI)

only

# BMJ Open

## Influence of health literacy on acceptance of influenza and pertussis vaccinations: a cross-sectional study among Spanish pregnant women

|                                 |                                                                                                                                                                                                                                                                                                                                                                                                                                                                                                                                                                                                                                                                                                                                                                                           |
|---------------------------------|-------------------------------------------------------------------------------------------------------------------------------------------------------------------------------------------------------------------------------------------------------------------------------------------------------------------------------------------------------------------------------------------------------------------------------------------------------------------------------------------------------------------------------------------------------------------------------------------------------------------------------------------------------------------------------------------------------------------------------------------------------------------------------------------|
| Journal:                        | <i>BMJ Open</i>                                                                                                                                                                                                                                                                                                                                                                                                                                                                                                                                                                                                                                                                                                                                                                           |
| Manuscript ID                   | bmjopen-2018-022132.R1                                                                                                                                                                                                                                                                                                                                                                                                                                                                                                                                                                                                                                                                                                                                                                    |
| Article Type:                   | Research                                                                                                                                                                                                                                                                                                                                                                                                                                                                                                                                                                                                                                                                                                                                                                                  |
| Date Submitted by the Author:   | 17-Apr-2018                                                                                                                                                                                                                                                                                                                                                                                                                                                                                                                                                                                                                                                                                                                                                                               |
| Complete List of Authors:       | Castro-Sánchez, Enrique; Imperial College London, Vila-Candel, Rafael; Hospital Universitario de la Ribera, Department of Obstetrics and Gynaecology,; Universidad Católica de Valencia 'San Vicente Mártir', Faculty of Nursing<br>Soriano-Vidal, Francisco; Foundation for the Promotion of Health and Biomedical Research in the Valencian Region (FISABIO)., Xàtiva-Ontinyent Health Department; Universidad Católica de Valencia 'San Vicente Mártir', Faculty of Nursing<br>Navarro-Illana, Esther; Universidad Católica de Valencia 'San Vicente Mártir', Faculty of Nursing<br>Domingo, Javier Diez; Foundation for the Promotion of Health and Biomedical Research in the Valencian Region (FISABIO).; Universidad Católica de Valencia 'San Vicente Mártir', Faculty of Nursing |
| <b>Primary Subject Heading</b>: | Public health                                                                                                                                                                                                                                                                                                                                                                                                                                                                                                                                                                                                                                                                                                                                                                             |
| Secondary Subject Heading:      | Reproductive medicine                                                                                                                                                                                                                                                                                                                                                                                                                                                                                                                                                                                                                                                                                                                                                                     |
| Keywords:                       | Immunisation, Influenza, Pertussis, Health literacy, Maternal medicine < OBSTETRICS                                                                                                                                                                                                                                                                                                                                                                                                                                                                                                                                                                                                                                                                                                       |
|                                 |                                                                                                                                                                                                                                                                                                                                                                                                                                                                                                                                                                                                                                                                                                                                                                                           |

SCHOLARONE™  
Manuscripts



1  
2  
3 **INFLUENCE OF HEALTH LITERACY ON ACCEPTANCE OF INFLUENZA AND**  
4 **PERTUSSIS VACCINATIONS: A CROSS-SECTIONAL STUDY AMONG SPANISH**  
5 **PREGNANT WOMEN**  
6  
7  
8  
9

10  
11 **Authors**  
12

13 Enrique Castro-Sánchez<sup>1</sup>, Rafael Vila-Candel<sup>2,3</sup>, Francisco J Soriano-Vidal<sup>3,4,5,6</sup>, Esther  
14 Navarro-Illana<sup>3</sup>, Javier Díez-Domingo<sup>3,5</sup>  
15  
16  
17  
18  
19

20 **Affiliation**  
21

22 <sup>1</sup>NIHR Health Protection Research Unit (HPRU) in Healthcare Associated Infections (HCAI)  
23 and Antimicrobial Resistance (AMR) at Imperial College London, London, United Kingdom.  
24  
25

26 <sup>2</sup>Department of Obstetrics and Gynaecology, Hospital Universitario de la Ribera, Valencia,  
27 Spain  
28  
29

30 <sup>3</sup>Faculty of Nursing, Universidad Católica de Valencia ‘San Vicente Mártir’, Valencia, Spain.  
31  
32

33 <sup>4</sup>Xàtiva-Ontinyent Health Department, Xàtiva, Spain.  
34

35 <sup>5</sup>Foundation for the Promotion of Health and Biomedical Research in the Valencian Region  
36 (FISABIO).  
37  
38

39 <sup>6</sup>Department of Nursing, University of Alicante. San Vicente del Raspeig, Alicante. Spain.  
40  
41  
42  
43

44 **Corresponding author**  
45

46 Enrique Castro-Sánchez, Imperial College London, Du Cane Road, London W12 0NN, UK,  
47 [\[e.castro-sanchez@imperial.ac.uk\]](mailto:e.castro-sanchez@imperial.ac.uk), +44 203 313 2732.  
48  
49  
50  
51

52 **Word count:** 2999  
53  
54  
55  
56  
57  
58  
59  
60

## ABSTRACT

### Objectives

Immunizations against influenza and *Bordetella pertussis* infection are recommended to pregnant women in Valencia (Spain), yet vaccination rates remain low. Health literacy (HL) appears as a crucial factor in vaccination decision-making. We explored the relation between HL of pregnant women and decisions to receive influenza and pertussis immunizations.

### Setting

University hospital in Valencia (Spain).

### Participants

119 women who gave birth at a hospital in Valencia (Spain) between November 2015 and May 2016. Women in the immediate postpartum period (more than 27 weeks of gestation), between November 2015 and May 2016 were included in the study. Women with impairments, language barriers or illiteracy which prevented completion of the questionnaires, or those who were under 18 years were excluded from enrolment.

Primary and secondary outcome measures: health literacy level; influenza and pertussis immunisation rate; reasons for rejection of vaccination.

### Results

119 participants were included (mean age  $32.3 \pm 5.5$  years, 52% primiparous, 95% full term deliveries). A higher education level was associated with SAHLSA\_50 (adjusted R-squared=0.22,  $p=0.014$ ) and NVS (adjusted R-squared=0.258,  $p=0.001$ ) scores. Depending on the scale, 56%-85% of participants had adequate HL. 52% (62/119) and 94% (112/119) of women received influenza and pertussis immunization, respectively. Women rejecting influenza vaccine had a higher HL level (measured by SALHSA\_50 tool) than those accepting it (Kruskal-Wallis test  $p=0.022$ ). 24% of women who declined influenza

1  
2  
3 vaccination felt the vaccine was unnecessary, and 23% claimed to have insufficient  
4  
5 information.

### 6 7 **Conclusions**

8  
9 Influenza vaccination rate was suboptimal in our study. Women with high HL were more  
10  
11 likely to decline immunization. Information from professionals needs to match patients' HL  
12  
13 levels to reduce negative perceptions of vaccination.  
14

15  
16  
17  
18 **Keywords:** influenza, pertussis, immunisation, health literacy, maternal medicine  
19  
20  
21  
22  
23  
24  
25  
26  
27  
28  
29  
30  
31  
32  
33  
34  
35  
36  
37  
38  
39  
40  
41  
42  
43  
44  
45  
46  
47  
48  
49  
50  
51  
52  
53  
54  
55  
56  
57  
58  
59  
60

## STRENGTHS AND LIMITATIONS OF THE STUDY

- This study investigated the relation between health literacy and immunisations routinely offered to pregnant women in Spain.
- Validated health literacy screening tools were administered to pregnant women to identify health literacy levels. Immunisation status was obtained from official vaccination records.
- Screening tools used in the study have been validated in Spanish-speaking populations in the US but not Spain.
- It is not possible to attribute the differences in vaccinations seen to health literacy solely due to the cross-sectional study design.
- Further research could focus on the development and use of pregnancy-specific scales.

## BACKGROUND

Despite its benefits, influenza vaccine coverage among pregnant women remains low.<sup>1</sup> Some determinants associated with vaccination rejection include insufficient information by professionals and underestimation of infection risks during pregnancy.<sup>2-4</sup>

However, pregnancy is a risk factor for severe influenza, a main reason for hospital admission during gestation.<sup>5</sup> The administration of influenza vaccine to pregnant women would protect immunized mothers and infants. As the safety of the vaccine is well established, its administration is recommended during any trimester of gestation. Globally, influenza vaccination coverage is uneven, ranging from 15-43% in Europe,<sup>6</sup> to 50% in United States (US).<sup>7</sup> In Spain there are no published data on national influenza vaccination coverage among pregnant women; however, our review in 2014-5 reported vaccination rates of 40.5% in pregnant women in our health department.<sup>8</sup>

Vaccination against *Bordetella pertussis* is equally recommended to all pregnant women in Valencia (Spain) since January 2015 due to outbreaks of whooping cough.<sup>9</sup> Women are offered immunisation on the third trimester, ideally between weeks 27-36 of gestation.<sup>6</sup> As with influenza, maternal immunization also benefits newborns.<sup>10</sup> According to WHO, 195,000 children under 5-years died in 2008 of whooping cough. More than 80% of deaths occurred in children younger than 6 months of age. The number of whooping cough cases has increased since 2011 worldwide, including the European Union, and among children and young adults. In Spain, the case incidence has shifted from 739 cases in 2008 to 3,088 cases in 2011, a global rate of 6.73/100,000 hab/year for that year. Additionally, 8 deaths in 2001 were attributed to whooping cough<sup>11</sup>. Of concern, there are currently no published data regarding whooping cough vaccination coverage among pregnant women in

1  
2  
3 Spain. However, reports on the incidence of whooping cough in 2015 are available indicating  
4  
5 17.99 cases per 100,000 people, with provisional data for 2016 suggesting a marked decline  
6  
7 in reported cases.<sup>12</sup>  
8

9  
10 Among the factors determining vaccination acceptance, health literacy (HL) refers to  
11  
12 the knowledge and skills required when making health decisions.<sup>13</sup> Essential HL skills  
13  
14 include reading, writing, numeracy, and searching for information.<sup>14,15</sup> Inadequate HL has  
15  
16 been associated with poor health outcomes including inadequate self-caring and preventive  
17  
18 behaviours such as vaccination.<sup>16</sup> Standardized tools for assessing HL are available, yet  
19  
20 mostly in English<sup>17</sup> and focused on US society. European researchers have developed  
21  
22 questionnaires,<sup>18</sup> and some tools (Short Assessment of Health Literacy for Spanish Adults  
23  
24 (SAHLSA\_50),<sup>19,20</sup> Newest Vital Sign (NVS)<sup>21-24</sup> and Single Item Literacy Screener  
25  
26 (SILS)<sup>25</sup> have been validated in Spanish language but not for Spanish citizens.  
27

28  
29 Although vaccination is especially relevant for pregnant women and wider public  
30  
31 health,<sup>26</sup> no studies have been conducted in Spain exploring the relationship between HL and  
32  
33 vaccine acceptance. We hypothesise that pregnant women with limited health literacy may be  
34  
35 less likely to accept influenza and pertussis vaccinations in Valencia (Spain).  
36  
37  
38  
39

## 40 **METHODS**

### 41 **Study population and sampling criteria**

42  
43 We conducted a cross-sectional study in women who had given birth at La Ribera university  
44  
45 hospital (Hospital Universitario de La Ribera, HULR) in Valencia (Spain). The HULR serves  
46  
47 a population of 250,000 citizens and is the only hospital providing maternity services to  
48  
49 pregnant women in the area, with an annual average of 1600 births in the year when the study  
50  
51 was carried out. The influenza and pertussis vaccine policy in the HULR mirrors the national  
52  
53 policy, where vaccines are offered systematically, by community midwives and family  
54  
55  
56  
57  
58  
59  
60

1  
2  
3 doctors, to all women free of charge. In 2015 the influenza vaccination rate for the whole  
4  
5 Valencian Community was 34.4%.  
6  
7  
8

9  
10 Immunization campaign in Spain starts in October and concludes in March. In order  
11  
12 to avoid seasonality, we included all women during the study period. Women in their  
13  
14 immediate postpartum period (more than 27 weeks of gestation), between November 2015  
15  
16 and May 2016 were included in the study. We excluded women with impairments, language  
17  
18 barriers or illiteracy. Illiterate women were excluded from the study due to their inability to  
19  
20 complete the health literacy screening tools, which were self-administered. Any help from the  
21  
22 researchers would likely influence the results.<sup>27</sup> Women younger than 18 years were also  
23  
24 excluded from taking part. Prior to data collection, written consent was obtained from each  
25  
26 participant. The study was conducted according to the basic principles of the Declaration of  
27  
28 Helsinki for all medical research and it was approved by the research ethics and research  
29  
30 committee of HULR on 10/07/15.  
31  
32

33  
34 For recruitment, we systematically approached all women admitted to the maternity  
35  
36 ward, every 4 days. To calculate the sample size, we used the SALHSA\_50 tool as a  
37  
38 reference with a cut-off score of 0-37 for inadequate literacy. Accepting an alpha risk of 0.05  
39  
40 and a beta risk of 0.2 in a bilateral contrast, with a common standard deviation of 7.0<sup>28</sup> and a  
41  
42 loss to follow-up rate of 10%, we estimated that 102 participants would be required.  
43  
44  
45

## 46 **Measurements**

47  
48 During the immediate postpartum (24-48 hours after delivery), we collected  
49  
50 sociodemographic, obstetric variables and vaccination status through review medical records,  
51  
52 as well as health literacy from each woman through interview with the researcher in charge.  
53  
54

55 Participants' HL was determined using three screening tools:  
56  
57  
58  
59  
60

1  
2  
3 1) SALHSA\_50: Evaluates word recognition and reading comprehension through a 50-item  
4 tool. Quantitative scores classify individuals with “adequate” (score: 38-50 points) or  
5 “inadequate” HL (score: 0-37 points). The tool has been validated for Hispanics in the US.  
6  
7

8  
9 2) NVS: Evaluates reading and numeracy through six questions about the label of an ice-  
10 cream. The sum score (0–6 points) categorize individuals with high likelihood limited  
11 literacy (score: 0-1 points), possibility of limited literacy (score: 2-3 points), and adequate  
12 literacy (score: 4-6 points). It has been validated for the Hispanic population in the US.<sup>23</sup> It  
13 has high sensitivity, but it can misclassify people with adequate health literacy.<sup>29</sup>  
14  
15

16 3) SILS: It asks patients how often they need help when reading health instructions. The  
17 response is recorded on a 5-point Likert-type scale (1-Never, 2-Rarely, 3-Sometimes, 4-Often  
18 and 5-Always) and categorized as adequate or inadequate. Scores greater than 2 indicate  
19 some difficulty with reading materials.<sup>25</sup>  
20  
21

22  
23  
24  
25  
26  
27  
28  
29 Regarding vaccination, we analysed: 1) influenza or pertussis vaccination status  
30 during pregnancy; 2) if vaccinated, health centre where vaccinated, 3) which healthcare  
31 provider recommended it and; 4) if vaccination rejection, reasons for declining. Vaccination  
32 status was corroborated using the regional Vaccination Registry which records all vaccines  
33 received by patients.<sup>30</sup>  
34  
35  
36  
37  
38

39  
40 Other variables collected through review of medical records included: age, country of  
41 origin, civil status, occupation, education, gestational age, parity, type of delivery, risk factors  
42 during pregnancy (without risk or low risk, pre-gestational or gestational diabetes, thyroid  
43 pathology, preeclampsia, twin pregnancy, and assisted reproduction treatment).  
44  
45  
46  
47  
48  
49

## 50 **Statistical analysis**

51  
52 In the univariate analysis, quantitative variables were described with means and standard  
53 deviation or median and interquartile range, depending on the normality of their distribution.  
54  
55  
56  
57  
58  
59



1  
2  
3 The Kolmogorov-Smirnov goodness-of-fit test was used to determine the normality of  
4 distributions. In the bivariate analysis, the Chi-square test was used between the qualitative  
5 variables and the vaccination status. To compare the medical risk factors during pregnancy  
6 related to vaccination, odds ratio (OR) with a 95% Confidence Interval (95% CI) were  
7 calculated.  
8  
9  
10  
11  
12

13 The non-parametric Mann-Whitney U test was used when the normality hypothesis  
14 was rejected when comparing independent samples with the categorised values of NVS and  
15 SAHLSA\_50 and vaccination acceptance. To identify the variables explaining the level of  
16 HL according to each screening tool a series of multivariate analyses were conducted. The  
17 multivariate lineal regression analysis (Wald statistic) was used regarding the explanatory  
18 covariates for the quantitative tools NVS and SALHSA\_50, and a multinomial model was  
19 constructed for the qualitative scale SILS. The level of statistical significance was set at 0.05.  
20 SPSS for Windows, V.22.0 (IBM Corp. Armonk, NY: IBM Corp) was used for data analysis.  
21  
22  
23  
24  
25  
26  
27  
28  
29  
30  
31  
32

### 33 **Patient and Public Involvement**

34 Patients were not involved in the development of the research questions, the design of the  
35 study, or the recruitment of participants. Aggregated study results will be published on the  
36 website of the hospital, in suitable language.  
37  
38  
39  
40  
41  
42  
43

### 44 **RESULTS**

45 Out of a total of 168 women who initially consented to be included in the study 49 were  
46 excluded (29%) for the following reasons: 10 (20%) were breastfeeding, 16 (33%) had  
47 language barriers, 16 (33%) were busy, 4 (8%) were absent from their room and 3 (6%) were  
48 unwell. Therefore, the study sample comprised 119 participants (71%).  
49  
50  
51  
52  
53  
54  
55  
56  
57  
58  
59  
60

**Table 1** presents sociodemographic characteristics of participants. The mean age was  $32.3 \pm 5.5$  years, with  $29.5 \pm 5.4$  as mean age for the first pregnancy. 52% (62) were primiparous. The mean gestational age at delivery was  $39.1 \pm 1.5$ , with 95% (113) full term deliveries (37-42 weeks).

**Table 1. Socio-demographic, clinical and obstetric characteristics of the sample by vaccine influenza status (n=119)**

|                                       |                          | Total row | Unvaccinated n=57 |    | Vaccinated n=62 |     | <sup>a</sup> p-value |
|---------------------------------------|--------------------------|-----------|-------------------|----|-----------------|-----|----------------------|
|                                       |                          | N         | N                 | %  | N               | %   |                      |
| Civil Status                          | With partner             | 48        | 20                | 35 | 28              | 45  | 0.458                |
|                                       | Married/civil partner    | 67        | 35                | 61 | 32              | 52  |                      |
|                                       | Separated/Divorced       | 4         | 2                 | 4  | 2               | 3   |                      |
| Level of Education                    | Primary school           | 40        | 20                | 36 | 20              | 32  | 0.296                |
|                                       | Secondary school         | 42        | 19                | 33 | 23              | 37  |                      |
|                                       | University               | 37        | 18                | 44 | 19              | 31  |                      |
| Employment Status                     | I                        | 13        | 9                 | 16 | 4               | 6   | 0.083                |
|                                       | II                       | 66        | 35                | 61 | 31              | 50  |                      |
|                                       | III                      | 2         | 0                 | 0  | 2               | 3   |                      |
|                                       | IV                       | 1         | 0                 | 0  | 1               | 2   |                      |
|                                       | V                        | 37        | 13                | 23 | 24              | 39  |                      |
| Country of Origin                     | Spain                    | 104       | 51                | 89 | 53              | 85  | 0.261                |
|                                       | Another EU country       | 8         | 5                 | 9  | 3               | 5   |                      |
|                                       | Non-EU country           | 1         | 0                 | 0  | 1               | 2   |                      |
|                                       | Central-South America    | 6         | 1                 | 2  | 5               | 8   |                      |
| Pertussis vaccine                     | Unvaccinated             | 7         | 7                 | 12 | 0               | 0   | 0.269                |
|                                       | Vaccinated               | 112       | 50                | 88 | 62              | 100 |                      |
| Medical Risk Factors During Pregnancy | None/Low risk            | 92        | 45                | 79 | 47              | 76  | 0.570                |
|                                       | Pre/Gest Diabetes        | 7         | 2                 | 3  | 5               | 8   |                      |
|                                       | Thyroid pathology        | 7         | 5                 | 9  | 2               | 3   |                      |
|                                       | Preeclampsia             | 1         | 0                 | 0  | 1               | 2   |                      |
|                                       | Twin pregnancy           | 3         | 1                 | 2  | 2               | 3   |                      |
|                                       | ART                      | 9         | 4                 | 7  | 5               | 8   |                      |
| NVS categories                        | Inadequate (0-1 points)  | 13        | 6                 | 10 | 7               | 11  | 0.219                |
|                                       | Limited (2-3 points)     | 38        | 14                | 25 | 24              | 39  |                      |
|                                       | Adequate (4-6 points)    | 68        | 37                | 65 | 31              | 50  |                      |
| SAHLSA categories                     | Inadequate (0-37 points) | 17        | 6                 | 10 | 11              | 18  | 0.261                |
|                                       | Adequate (38-50 points)  | 102       | 51                | 89 | 51              | 82  |                      |
| SILS categories                       | Never                    | 29        | 13                | 23 | 16              | 26  | 0.947                |
|                                       | Rarely                   | 34        | 17                | 30 | 17              | 27  |                      |

|  |           |    |    |    |    |    |
|--|-----------|----|----|----|----|----|
|  | Sometimes | 33 | 17 | 30 | 16 | 26 |
|  | Often     | 8  | 4  | 7  | 4  | 6  |
|  | Always    | 15 | 6  | 10 | 9  | 14 |

<sup>a</sup>Chi-square; I: self-employed, higher professional or managerial employment; II: employee; III: student; IV: stay-at-home mother; V: unemployed; EU= European Union; ART= Assisted Reproduction Treatment.

The information and recommendation about vaccination came mainly from their midwives (94%), in 4% from the family doctor and 2% of women did not provide any information. As we wanted to be as sure as possible of the vaccination status of each participant, we validated the vaccination status reported by the participants with the immunization status recorded in the official electronic immunization registry. We corroborated that all women without immunisation recorded on the electronic record had not been vaccinated.

Regarding HL screening tools, the correlation between SAHLSA\_50 and SILS was moderate, inversely proportional and significant ( $r = -0.251$ ,  $p = 0.007$ ). The correlation between NVS and SAHLSA\_50 was moderate and significant ( $r = 0.349$ ,  $p < 0.001$ ). The correlation between NVS and SILS was moderate, inversely proportional and also significant ( $r = -0.307$ ,  $p = 0.001$ ).

We also analysed the influence of participants' education on HL level and the scales of assessment. Higher education was directly related to higher SAHLSA\_50 ( $r = 0.244$ ,  $p < 0.001$ ) and NVS ( $r = 0.366$ ,  $p = 0.002$ ) scores. This relationship however was not present in the SILS scale.

### **Vaccination status**

17% (20/62) of women had been vaccinated against influenza prior to pregnancy. Gestational influenza vaccination coverage was 52% (62/119). The vaccine was administered to 5% (4/62) of women by week 20, and to 16% (10/62) in the last weeks of gestation (more than 36 weeks). Concerning pertussis vaccine, 94% (112/119) of women had it during pregnancy,

1  
2  
3 with 86% (96/112) vaccinated between weeks 27-32 of gestation. All women vaccinated  
4 against influenza were simultaneously vaccinated against whooping cough. There were no  
5 significant differences in sociodemographic or obstetric characteristics between pregnant  
6 vaccination status for influenza or pertussis ( $p=0.15$  and  $p=0.35$ , respectively) [data not  
7 shown].  
8  
9  
10  
11  
12

13 The reasons for rejection of women who were not vaccinated against influenza during  
14 pregnancy (57) are shown in **Figure 1**. 25% (14/57) felt that the vaccine was unnecessary,  
15 23% (13/57) claimed to have received insufficient information from health professionals and  
16 14% (8/57) claimed that they had never been infected. The reasons reported by women  
17 declining vaccination against pertussis were lack of information from health professionals  
18 (4/7 [57%]) and lack of any prenatal care (3/7 [43%]).  
19  
20  
21  
22  
23  
24  
25  
26  
27  
28

29 **Figure 1 about here**  
30  
31  
32

### 33 **Health literacy**

34 In the NVS scale we obtained an average score of  $3.7 \pm 1.6$  with values between 0 and 6.  
35 These scores were categorized as inadequate [13% (16/119)], limited [30% (36/119)] and  
36 adequate HL [56% (67)]. SAHLSA\_50 scores were  $44.1 \pm 4.4$  out of 50. An 86% (102/119)  
37 of women had adequate HL levels (SAHLSA-50 score > 37). According to the SILS, 24%  
38 (29/119) women replied 'never' needing help when reading information, 29% (35/119)  
39 'rarely', 27% (32/119) 'sometimes' and only 6% (7/119) replied 'often' and 13% (16/119)  
40 replied 'always'.  
41  
42  
43  
44  
45  
46  
47  
48  
49

50 To identify variables explaining HL levels according to each screening tool  
51 multivariate analyses were conducted. Multivariate lineal regression was used regarding the  
52 explanatory covariates for quantitative tools NVS and SALHSA\_50. For these, the level of  
53  
54  
55  
56  
57  
58  
59  
60

1  
2  
3 education was found to be statistically significant (NVS [adjusted R-squared=0.258;  
4 p=0.001] and SALHSA\_50 [adjusted R-squared=0.220; p=0.014]). A multinomial model was  
5 constructed for the qualitative scale SILS, observing no statistically significant differences.  
6  
7

8  
9 There were no differences in NVS and SILS scores between women who declined and  
10 those who accepted influenza vaccination (Mann-Whitney U test, p=0.320 and p=0.942  
11 respectively). However, for SAHLSA\_50 (Median=44.5; IQR=5.0 vs 45.0; IQR=5.5) the  
12 differences were statistically significant (Mann-Whitney U test, p=0.019) (See **Figure 2**).  
13  
14  
15  
16  
17  
18  
19

20 **Figure 2 about here**  
21  
22  
23

24 Later, scores from the quantitative health literacy screening tools (NVS,  
25 SALHSA\_50) were distributed in quartiles (**Figure 3**). For the NVS scale we found no  
26 statistically significant difference between women who had accepted or declined vaccination  
27 (p=0.532). However, such difference was seen when using the SALHSA\_50 tool (Kruskal-  
28 Wallis test, p=0.022). The median number of women vaccinated in the bottom quartile was 8  
29 (95% CI: 7.0-9.0) versus 24 (95% CI: 23.0-25.0) in the top quartile.  
30  
31  
32  
33  
34  
35  
36

37 We were interested in examining the characteristics of the women who were excluded  
38 from the study (49). We conducted an analysis of missing values for the three health literacy  
39 screening tools using the multiple imputation chained equations method.<sup>31</sup> Again, for the  
40 NVS scale we found no statistically significant difference between women who had accepted  
41 or declined vaccination (p=0.372) and, instead, such difference was seen when using the  
42 SALHSA\_50 tool (Kruskal-Wallis test, p=0.003). The median number of women vaccinated  
43 in the bottom quartile was 11 (95% CI: 9.0-12.0) vs 28 (95% CI: 27.0-29.0) in the top  
44 quartile.  
45  
46  
47  
48  
49  
50  
51  
52  
53  
54  
55  
56  
57  
58  
59  
60

**Figure 3 about here**

Regarding the NVS, scores between pertussis-vaccinated and unvaccinated women were similar (Median= 4.0; IQR=0.0 vs Median=4.0; IQR=2.75), like the SAHLSA\_50 scale (Median= 45.0; IQR=0.0 vs Median= 45.0; IQR=5.0). We also did not find any difference with the results from the SILS tool.

**DISCUSSION**

Vaccination is an essential public health intervention. We focused on pregnant women, an especially vulnerable population, and studied the acceptance of two vaccines underutilised in our community.<sup>8</sup> Few studies evaluating HL and vaccination have been conducted thus far and, up to now, none had focused on pregnant women.

In our study, influenza vaccination did not reach recommended levels although coverage slightly exceeded Australian<sup>32</sup> but not US rates.<sup>33</sup> In Valencia coverage has progressively improved from 2011 (8.5%) to 2015 (34.4%).<sup>8</sup> Regarding pertussis, the 97% vaccination rate improves on Belgian (39%)<sup>34</sup> or UK (70%)<sup>6</sup> rates. The disparity between pertussis and influenza immunization rates has not been previously addressed in detail.<sup>6</sup> We believe that in our setting, fear to pertussis –perhaps influenced by mass media<sup>35</sup> and fuelled by the increasing number of cases– could explain such high vaccination prevalence. Indeed, the pertussis vaccination programme was commenced following a surge in the number of cases and deaths. Clinicians may have therefore been keener to ensure that pregnant women got vaccinated and may have framed their advice more assertively. On the other hand, the disinterest from health professionals in providing information about influenza vaccination together with maternal perceptions that influenza vaccine was unnecessary were the most frequently cited causes of vaccine rejection, in agreement with prior studies.<sup>5–8,36</sup> This

1  
2  
3 position obviously ignores the benefits of acquired immunity for the newborn, which could  
4  
5 reduce perinatal infections.<sup>37</sup>  
6

7 We found that NVS classified 58% of participants with adequate HL. However, this  
8  
9 figure increased up to 89% if SAHLSA\_50 was used. Currently, there are no publications  
10  
11 comparing both scales simultaneously in the same population. Such discrepancy between  
12  
13 screening tools could be of much relevance as, of the tools pragmatically chosen for our  
14  
15 research, only SALHSA\_50 was predictive of vaccination in pregnant women. However,  
16  
17 women with high SALHSA\_50 scores were more likely to decline influenza vaccination,  
18  
19 perhaps due to pre-conceived ideas; it might also be that women with high HL have more  
20  
21 abilities to look for information on the internet or other sources and construct a narrative that  
22  
23 supports such preconceptions, leading to decline this vaccination.<sup>38</sup> Such narratives would  
24  
25 also no be challenged if professionals fail to adequately inform them or focus their persuasion  
26  
27 solely on rational, data-based reasons instead of complementing such evidence with other  
28  
29 emotional and behavioural aspects.<sup>37,39,40</sup> These results diverge from current evidence<sup>4</sup> in this  
30  
31 group of women possibly highly involved in their health care, as already explored.<sup>41</sup>  
32  
33  
34

35 As perhaps expected, HL screening results were directly related to the education of  
36  
37 participants and thus, a higher level of education was associated with higher HL.  
38  
39 Interestingly, other authors have reported that a higher level of education is associated with  
40  
41 higher rates of vaccine rejection and hesitation.<sup>36,42</sup> In fact, it would appear that the emerging  
42  
43 relationship between HL and vaccination described by those authors may be represented as  
44  
45 an 'inverted U' shape' (i.e., high and low HL levels equally associated with low vaccination).  
46  
47

48 The analysis of missing values would help resolve some of the challenges originated  
49  
50 from the incomplete responses. If cases with missing data were to be systematically different  
51  
52 to cases with complete information, then results could be equivocal.<sup>31</sup> In our case, however,  
53  
54  
55  
56  
57  
58  
59  
60

1  
2  
3 the analysis of missing values did not produce different results to the original analysis  
4  
5 conducted without imputed values.  
6

7 Our study presents limitations. Although there are approximately 51 HL tools  
8  
9 available,<sup>17</sup> experiences in Spain with these instruments have been few and limited to the  
10  
11 Health Literacy Survey - European Union<sup>43</sup> or the eHealth Literacy (eHL)<sup>44</sup> tools. In addition,  
12  
13 none of these tools have been validated in Spain, yet they have been so in Spanish-speaking  
14  
15 US populations. Moreover, as there are no scales specifically focused on pregnant women,  
16  
17 our questionnaire selection was eminently pragmatic and based on ease of use (SILS),  
18  
19 robustness (SAHLSA\_50) and reliability (NVS). Additionally, the routine use of HL  
20  
21 screening tools in clinical practice remains nevertheless controversial, as such routine  
22  
23 screening has shown no benefits yet could have undesirable effects for patients.<sup>45</sup>  
24  
25

26  
27 Decisions related to vaccination may be influenced by the information provided, the  
28  
29 communication approaches and attitudes of by health professionals.<sup>36,37</sup> Since there is  
30  
31 currently no standardized approach to determine the abilities that pregnant women have to  
32  
33 make effective use of the information provided, we hypothesise that information offered to  
34  
35 each woman will be more or less similar and, therefore, women with low HL may be more  
36  
37 likely to make suboptimal decisions because of such deficit. Logically, this does not consider  
38  
39 efforts that professionals may make to compensate for any difficulties in understanding.  
40  
41 Although exploring such efforts was outside the remit of our work, it would be interesting to  
42  
43 investigate this aspect in future studies, together with any supporting materials used by  
44  
45 professionals.  
46  
47  
48  
49

## 50 **CONCLUSION**

51  
52 Vaccination is an essential public health measure and pregnant women can particularly  
53  
54 benefit from this intervention. Identifying determinants of vaccination such as health literacy  
55  
56  
57  
58  
59



1  
2  
3 would facilitate an adequate use of resources to encourage shared decision-making,  
4 ultimately resulting in optimal vaccination rates. Our findings suggesting a relation between  
5 high health literacy and rejection of vaccination encourage further research to identify and  
6 describe the factors involved in such relation and implement mitigating initiatives.  
7  
8  
9  
10  
11  
12  
13  
14

## 15 **FUNDING**

16  
17 This work was supported by the Universidad Católica de Valencia “San Vicente Mártir”  
18 (Spain) through a competitive grant call [PRUCV/2015/639]. ECS is affiliated with the  
19 National Institute for Health Research (NIHR) Health Protection Research Unit (HPRU) in  
20 Healthcare Associated Infection and Antimicrobial Resistance at Imperial College London in  
21 partnership with Public Health England (PHE), and the NIHR Imperial Patient Safety  
22 Translational Research Centre. ECS has received an Early Career Research Fellowship from  
23 the Antimicrobial Research Collaborative at Imperial College London and acknowledges the  
24 support of the Florence Nightingale Foundation. The views expressed are those of the authors  
25 and not necessarily those of the NHS, the NIHR, the Department of Health, or Public Health  
26 England. The funders had no role in study design; collection, analysis, and interpretation of  
27 data; writing the report; and the decision to submit the report for publication.  
28  
29  
30  
31  
32  
33  
34  
35  
36  
37  
38  
39  
40  
41  
42  
43

## 44 **COMPETING INTERESTS**

45 None declared.  
46  
47  
48  
49

## 50 **AUTHOR CONTRIBUTION**

51  
52 ECS RVC conceptualized and designed the study, RVC FSV collected data, ECS RVC FSV  
53 carried out the data analyses, ECS RVC ENI JDD FSV drafted the initial manuscript, ECS  
54  
55  
56  
57  
58  
59  
60

1  
2  
3 RVC FSV ENI JDD reviewed and revised the manuscript. All authors read and approved the  
4  
5 final manuscript.  
6  
7

#### 8 9 **DATA SHARING**

10  
11 No additional data are available.  
12  
13

#### 14 15 16 17 **ETHICAL APPROVAL**

18  
19 The study was conducted in compliance with the Declaration of Helsinki and it was approved  
20  
21 by the research ethics and research committee of HULR on 10/07/15.  
22  
23

#### 24 25 26 **ACKNOWLEDGEMENTS**

27  
28 We are grateful to the Universidad Católica de Valencia and to the HULR for their support  
29  
30 and participation in this project, and to all the women who have also taken part. We also  
31  
32 thank Professor Daniel Lee for authorising the use of the SALHSA\_50 tool in our research.  
33  
34  
35  
36  
37  
38  
39  
40  
41  
42  
43  
44  
45  
46  
47  
48  
49  
50  
51  
52  
53  
54  
55  
56  
57  
58  
59  
60

**REFERENCES**

1. Fiore AE, Uyeki TM, Broder K, et al. Prevention and control of influenza with vaccines: recommendations of the Advisory Committee on Immunization Practices (ACIP), 2010. *MMWR Recomm Rep*. 2010;59(RR-8):1-62. doi:10.1111/j.1600-6143.2011.03793.x.
2. Regan AK, Mak DB, Hauck YL, Gibbs R, Tracey L, Effler P V. Trends in seasonal influenza vaccine uptake during pregnancy in Western Australia: Implications for midwives. *Women and Birth*. 2016;29(5):423-429. doi:10.1016/j.wombi.2016.01.009.
3. Tamma PD, Ault KA, del Rio C, Steinhoff MC, Halsey NA, Omer SB. Safety of influenza vaccination during pregnancy. *Am J Obstet Gynecol*. 2009;201(6):547-552. [http://www.ajog.org/article/S0002-9378\(09\)01108-9/pdf](http://www.ajog.org/article/S0002-9378(09)01108-9/pdf).
4. Yudin MH, Salaripour M, Sgro MD. Pregnant Women's Knowledge of Influenza and the Use and Safety of the Influenza Vaccine During Pregnancy. *J Obstet Gynaecol Canada*. 2009;31(2):120-125. doi:10.1016/S1701-2163(16)34095-6.
5. Panda B, Stiller R, Panda A. Influenza vaccination during pregnancy and factors for lacking compliance with current CDC guidelines. *J Matern Fetal Neonatal Med*. 2011;24(3):402-406. doi:10.3109/14767058.2010.497882.
6. Laenen J, Roelants M, Devlieger R, Vandermeulen C. Influenza and pertussis vaccination coverage in pregnant women. *Vaccine*. 2015;33(18):2125-2131.

- 1  
2  
3 doi:10.1016/j.vaccine.2015.03.020.  
4  
5 7. Ding H, Black CL, Ball S, et al. Influenza Vaccination Coverage Among Pregnant  
6 Women--United States, 2014-15 Influenza Season. *MMWR Morb Mortal Wkly Rep*.  
7 2015;64(36):1000-1005. doi:10.15585/mmwr.mm6436a2.  
8  
9  
10  
11 8. Vila-Candel R, Navarro-Illana P, Navarro-Illana E, et al. Determinants of seasonal  
12 influenza vaccination in pregnant women in Valencia, Spain. *BMC Public Health*.  
13 2016;16:1173. doi:10.1186/s12889-016-3823-1.  
14  
15  
16  
17 9. Torres J, Godoy P, Artigues A, et al. [Outbreak of whooping cough with a high attack  
18 rate in well-vaccinated children and adolescents]. *Enfermedades Infecc y Microbiol*  
19 *clínica*. 2011;29(8):564-567. doi:10.1016/j.eimc.2011.04.005.  
20  
21  
22  
23  
24 10. Amirthalingam G, Andrews N, Campbell H, et al. Effectiveness of maternal pertussis  
25 vaccination in England: An observational study. *Lancet*. 2014;384(9953):1521-1528.  
26  
27 doi:10.1016/S0140-6736(14)60686-3.  
28  
29  
30  
31 11. WHO. Pertussis vaccines: WHO position paper, August 2015-Recommendations.  
32 *Vaccine*. 2016;34(12):1423-1425. doi:10.1016/j.vaccine.2015.10.136.  
33  
34  
35 12. Situación de la Tos ferina en España, 2005-2016. Centro Nacional de Epidemiología.  
36 Ministerio de Economía, Industria y Competitividad.  
37 [http://www.isciii.es/ISCIII/es/contenidos/fd-servicios-cientifico-tecnicos/fd-](http://www.isciii.es/ISCIII/es/contenidos/fd-servicios-cientifico-tecnicos/fd-vigilancias-alertas/fd-enfermedades/pdf_2016/INFORME_Tos_ferina_Espana_2005-2016.pdf)  
38 [vigilancias-alertas/fd-enfermedades/pdf\\_2016/INFORME\\_Tos\\_ferina\\_Espana\\_2005-](http://www.isciii.es/ISCIII/es/contenidos/fd-servicios-cientifico-tecnicos/fd-vigilancias-alertas/fd-enfermedades/pdf_2016/INFORME_Tos_ferina_Espana_2005-2016.pdf)  
39 [2016.pdf](http://www.isciii.es/ISCIII/es/contenidos/fd-servicios-cientifico-tecnicos/fd-vigilancias-alertas/fd-enfermedades/pdf_2016/INFORME_Tos_ferina_Espana_2005-2016.pdf). Published 2016. Accessed October 20, 2017.  
40  
41  
42  
43  
44  
45  
46 13. Sørensen K, Van den Broucke S, Fullam J, et al. Health literacy and public health: A  
47 systematic review and integration of definitions and models. *BMC Public Health*.  
48 2012;12(1):80. doi:10.1186/1471-2458-12-80.  
49  
50  
51  
52 14. Baker DW. The meaning and the measure of health literacy. *J Gen Intern Med*.  
53 2006;21(8):878-883. doi:10.1111/j.1525-1497.2006.00540.x.  
54  
55  
56  
57  
58  
59  
60

15. Nutbeam D. Health literacy as a public goal: a challenge for contemporary health education and communication strategies into the 21st century. *Heal Promot Int*. 2000;15(3):259-267. doi:10.1093/heapro/15.3.259.
16. Heijmans M, Uiters E, Rose T, et al. *Study on Sound Evidence for a Better Understanding of Health Literacy in the European Union.*; 2015. doi:10.2818/150402.
17. Haun JN, Valerio MA, McCormack LA, Sørensen K, Paasche-Orlow MK. Health literacy measurement: An inventory and descriptive summary of 51 instruments. *J Health Commun*. 2014;19:302-333. doi:10.1080/10810730.2014.936571.
18. Sørensen K, Pelikan JM, Röthlin F, et al. Health literacy in Europe: comparative results of the European health literacy survey (HLS-EU). *Eur J Public Health*. 2015;25(6):1053-1058. doi:10.1093/eurpub/ckv043.
19. Lee S-YD, Stucky BD, Lee JY, Rozier RG, Bender DE. Short Assessment of Health Literacy-Spanish and English: a comparable test of health literacy for Spanish and English speakers. *Health Serv Res*. 2010;45(4):1105-1120. doi:10.1111/j.1475-6773.2010.01119.x.
20. Vilca Yengle LM, Campins Martí M, Cabero Roura L, et al. [Influenza vaccination in pregnant women. Coverage, practices and knowledge among obstetricians]. *Med Clin (Barc)*. 2010;134(4):146-151.
21. Castro-Sánchez E, Chang PWS, Vila-Candel R, Escobedo AA, Holmes AH. Health literacy and infectious diseases: why does it matter? *Int J Infect Dis*. 2016;43:103-110. doi:10.1016/j.ijid.2015.12.019.
22. Morrison AK, Schapira MM, Hoffmann RG, Brousseau DC. Measuring health literacy in caregivers of children: a comparison of the newest vital sign and S-TOFHLA. *Clin Pediatr (Phila)*. 2014;53(13):1264-1270. doi:10.1177/0009922814541674.
23. Warsh J, Chari R, Badaczewski A, Hossain J, Sharif I. Can the Newest Vital Sign be

- 1  
2  
3 used to assess health literacy in children and adolescents? *Clin Pediatr (Phila)*.  
4 2014;53(2):141-144. doi:10.1177/0009922813504025.  
5  
6  
7 24. Weiss BD, Mays MZ, Martz W, et al. Quick assessment of literacy in primary care:  
8 The newest vital sign. *Ann Fam Med*. 2005;3(6):514-522. doi:10.1370/afm.405.  
9  
10  
11 25. Morris NS, MacLean CD, Chew LD, Littenberg B. The Single Item Literacy Screener:  
12 evaluation of a brief instrument to identify limited reading ability. *BMC Fam Pract*.  
13 2006;7:21. doi:10.1186/1471-2296-7-21.  
14  
15  
16 26. Mak TK, Mangtani P, Leese J, Watson JM, Pfeifer D. Influenza vaccination in  
17 pregnancy: current evidence and selected national policies. *Lancet Infect Dis*.  
18 2008;8(1):44-52.  
19  
20  
21 27. Davis RE, Couper MP, Janz NK, Caldwell CH, Resnicow K. Interviewer effects in  
22 public health surveys. *Health Educ Res*. 2010;25(1):14-26.  
23 http://dx.doi.org/10.1093/her/cyp046.  
24  
25  
26 28. Padilla-Santoyo P, Vílchez-Román C. Psychometric properties of the SAHLSA-50, a  
27 standardized test to evaluate the health literacy. *Rev Per Obs Enf*. 2008;4(2):90-95.  
28  
29  
30 29. Delanoë A, Lépine J, Leiva Portocarrero ME, et al. Health literacy in pregnant women  
31 facing prenatal screening may explain their intention to use a patient decision aid: a  
32 short report. *BMC Res Notes*. 2016;9(1):339. doi:10.1186/s13104-016-2141-0.  
33  
34  
35 30. Vila-Candel R, Navarro-Illana P, Navarro-Illana E, et al. Determinants of seasonal  
36 influenza vaccination in pregnant women in Valencia, Spain. *BMC Public Health*.  
37 2016;16(1):1173. doi:10.1186/s12889-016-3823-1.  
38  
39  
40 31. Hayati Rezvan P, Lee KJ, Simpson JA. The rise of multiple imputation: a review of  
41 the reporting and implementation of the method in medical research. *BMC Med Res*  
42 *Methodol*. 2015;15(1):30. doi:10.1186/s12874-015-0022-1.  
43  
44  
45 32. Maher L, Hope K, Torvaldsen S, et al. Influenza vaccination during pregnancy:  
46  
47  
48  
49  
50  
51  
52  
53  
54  
55  
56  
57  
58  
59  
60

- 1  
2  
3 Coverage rates and influencing factors in two urban districts in Sydney. *Vaccine*.  
4 2013;31(47):5557-5564. doi:10.1016/j.vaccine.2013.08.081.  
5  
6  
7 33. Henninger M. Trends in Influenza Vaccine Coverage in Pregnant Women, 2008 to  
8 2012. *Perm J*. 2013;17(2):31-36. doi:10.7812/TPP/12-115.  
9  
10  
11 34. Maertens K, Caboré RN, Huygen K, Hens N, Van Damme P, Leuridan E. Pertussis  
12 vaccination during pregnancy in Belgium: Results of a prospective controlled cohort  
13 study. *Vaccine*. 2016;34(1):142-150. doi:10.1016/j.vaccine.2015.10.100.  
14  
15  
16 35. Campins M, Moreno-Perez D, Gil-de Miguel A, et al. [Whooping cough in Spain.  
17 Current epidemiology, prevention and control strategies. Recommendations by the  
18 Pertussis Working Group]. *Enferm Infecc Microbiol Clin*. 2013;31(4):240-253.  
19 doi:10.1016/j.eimc.2012.12.011.  
20  
21  
22 36. Biasio LR. Vaccine hesitancy and health literacy. *Hum Vaccin Immunother*.  
23 2017;13(3):701-702. doi:10.1080/21645515.2016.1243633.  
24  
25  
26 37. Lorini C, Santomauro F, Donzellini M, et al. Health literacy and vaccination: A  
27 systematic review. *Hum Vaccin Immunother*. October 2017:00-00.  
28 doi:10.1080/21645515.2017.1392423.  
29  
30  
31 38. Stahl JP, Cohen R, Denis F, et al. The impact of the web and social networks on  
32 vaccination. New challenges and opportunities offered to fight against vaccine  
33 hesitancy. *Med Mal Infect*. 2016;46(3):117-122. doi:10.1016/j.medmal.2016.02.002.  
34  
35  
36 39. Nicolai LM, Pettigrew MM. The Role of Cognitive Bias in Suboptimal HPV Vaccine  
37 Uptake. *Pediatrics*. 2016;138(4):e20161537.  
38  
39  
40 40. Yaqub O, Castle-Clarke S, Sevdalis N, Chataway J. Attitudes to vaccination: A critical  
41 review. *Soc Sci Med*. 2014;112:1-11. doi:10.1016/j.socscimed.2014.04.018.  
42  
43  
44 41. Fadda M, Depping MK, Schulz PJ. Addressing issues of vaccination literacy and  
45 psychological empowerment in the measles-mumps-rubella (MMR) vaccination  
46  
47  
48  
49  
50  
51  
52  
53  
54  
55  
56  
57  
58  
59  
60

- 1  
2  
3 decision-making: a qualitative study. *BMC Public Health*. 2015;15:836.  
4  
5 doi:10.1186/s12889-015-2200-9.  
6  
7 42. Hak E, Schnbeck Y, De Melker H, Van Essen GA, Sanders EAM. Negative attitude of  
8  
9 highly educated parents and health care workers towards future vaccinations in the  
10  
11 Dutch childhood vaccination program. *Vaccine*. 2005;23(24):3103-3107.  
12  
13 doi:10.1016/j.vaccine.2005.01.074.  
14  
15 43. Sorensen K, Van den Broucke S, Pelikan JM, et al. Measuring health literacy in  
16  
17 populations: illuminating the design and development process of the European Health  
18  
19 Literacy Survey Questionnaire (HLS-EU-Q). *BMC Public Health*. 2013;13(1):948.  
20  
21 doi:10.1186/1471-2458-13-948.  
22  
23 44. Paramio Perez G, Almagro BJ, Hernando Gomez A, Aguaded Gomez JI. [Validation  
24  
25 of the eHealth Literacy Scale (eHEALS) in Spanish University Students]. *Rev Esp*  
26  
27 *Salud Publica*. 2015;89(3):329-338. doi:10.4321/s1135-57272015000300010.  
28  
29 45. Dickens C. Health Literacy and Nursing. *AJN, Am J Nurs*. 2013;113(6):52-57.  
30  
31 doi:10.1097/01.NAJ.0000431271.83277.2f.  
32  
33  
34  
35  
36  
37  
38  
39  
40  
41  
42  
43  
44  
45  
46  
47  
48  
49  
50  
51  
52  
53  
54  
55  
56  
57  
58  
59  
60



1  
2  
3  
4  
5  
6  
7  
8  
9  
10  
11  
12  
13  
14  
15  
16  
17  
18 **FIGURE TITLES**

19  
20 **Figure 1. Reasons given by participants to decline influenza vaccination**

21  
22  
23  
24 **Figure 2. Relationship between acceptance of influenza vaccination and SAHLSA\_50**  
25  
26 **scale (N=119)**

27  
28  
29  
30  
31 **Figure 3. Relationship between acceptance of influenza vaccination and SAHLSA\_50**  
32 **scale distribution by quartiles (N=119)**

1  
2  
3  
4  
5  
6  
7  
8  
9  
10  
11  
12  
13  
14  
15  
16  
17  
18  
19  
20  
21  
22  
23  
24  
25  
26  
27  
28  
29  
30  
31  
32  
33  
34  
35  
36  
37  
38  
39  
40  
41  
42  
43  
44  
45  
46  
47  
48  
49  
50  
51  
52  
53  
54  
55  
56  
57  
58  
59  
60

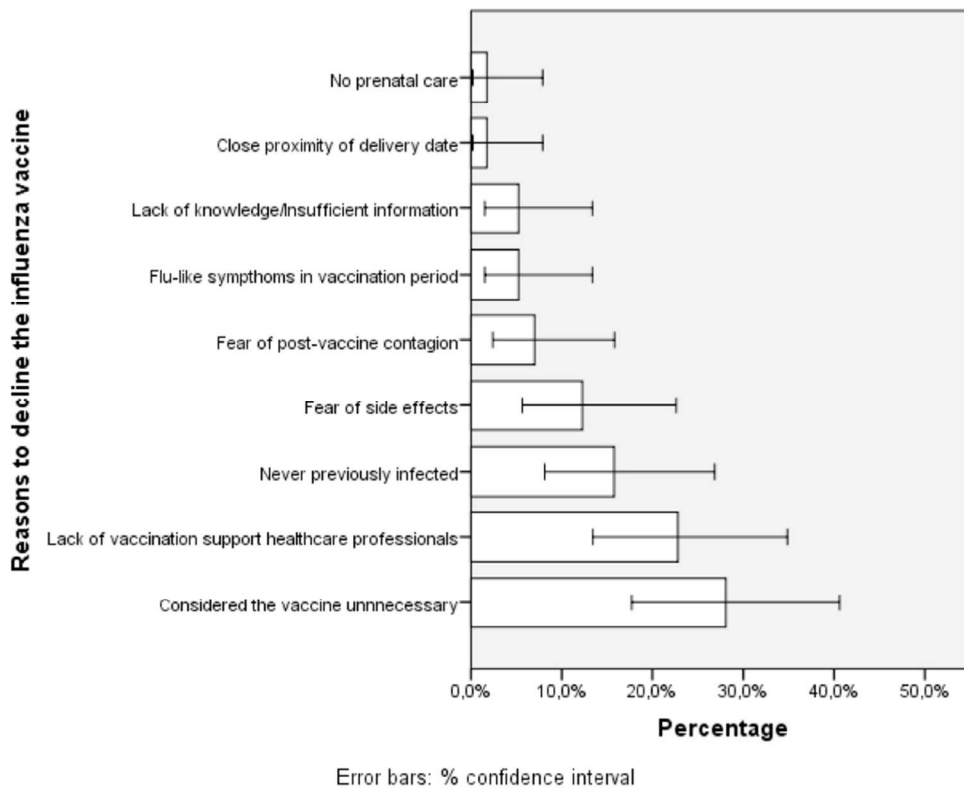

Figure 1. Reasons given by participants to decline influenza vaccination

79x63mm (300 x 300 DPI)

1  
2  
3  
4  
5  
6  
7  
8  
9  
10  
11  
12  
13  
14  
15  
16  
17  
18  
19  
20  
21  
22  
23  
24  
25  
26  
27  
28  
29  
30  
31  
32  
33  
34  
35  
36  
37  
38  
39  
40  
41  
42  
43  
44  
45  
46  
47  
48  
49  
50  
51  
52  
53  
54  
55  
56  
57  
58  
59  
60

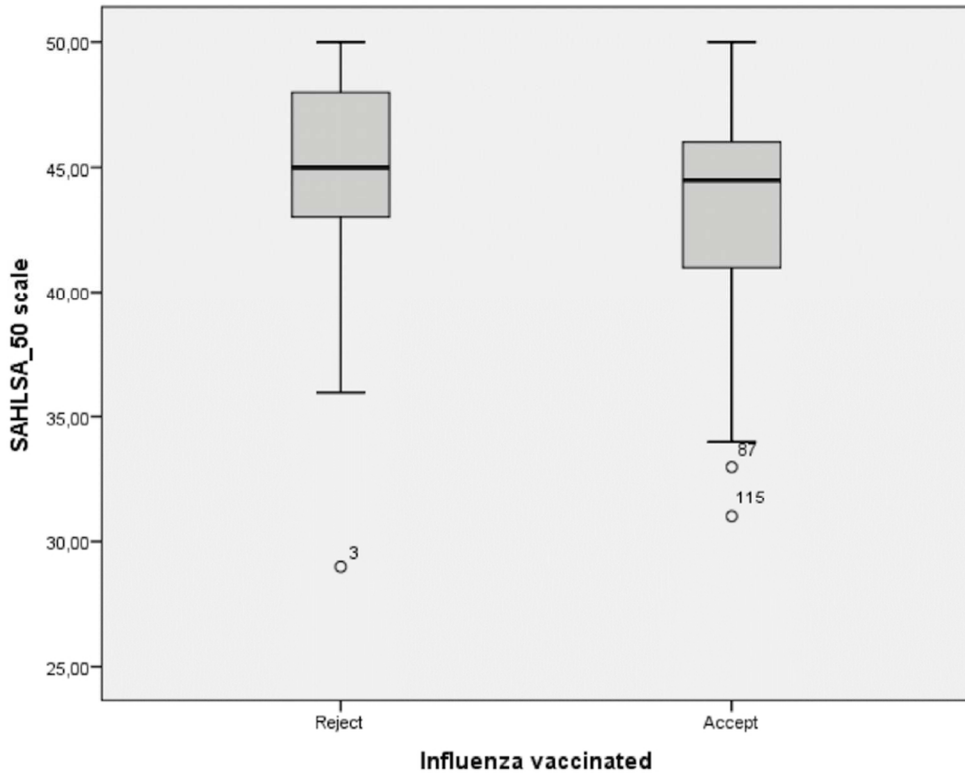

Figure 2. Relationship between acceptance of influenza vaccination and SAHLSA\_50 scale (N=119)

81x65mm (300 x 300 DPI)

View only

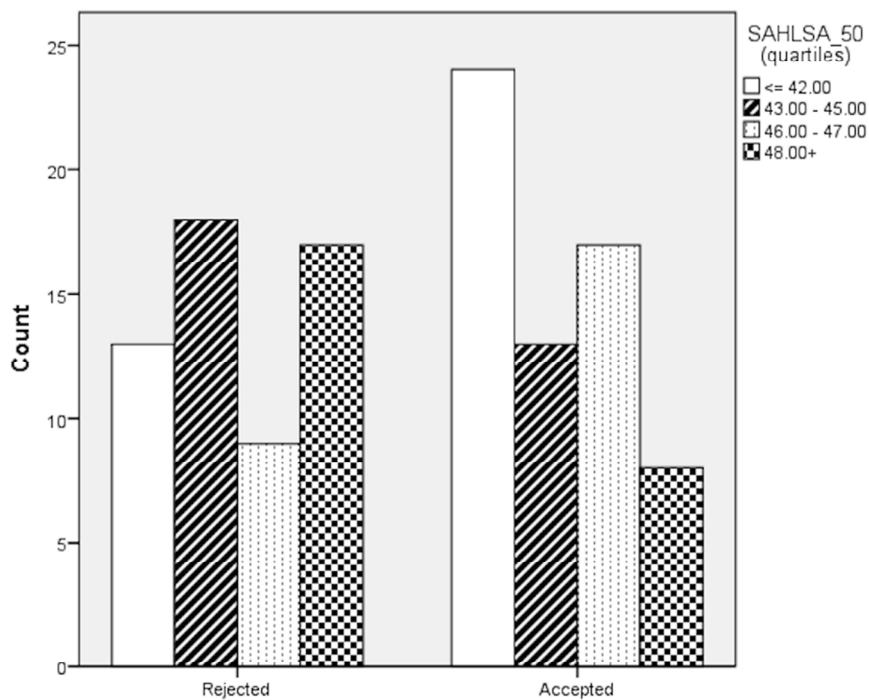

Figure 3. Relationship between acceptance of influenza vaccination and SAHLSA\_50 scale distribution by quartiles (N=119)

81x65mm (300 x 300 DPI)

only

**STROBE 2007 (v4) Statement—Checklist of items that should be included in reports of *cross-sectional studies***

| Section/Topic                | Item # | Recommendation                                                                                                                                                                       | Reported on page # |
|------------------------------|--------|--------------------------------------------------------------------------------------------------------------------------------------------------------------------------------------|--------------------|
| <b>Title and abstract</b>    | 1      | (a) Indicate the study’s design with a commonly used term in the title or the abstract                                                                                               | 1                  |
|                              |        | (b) Provide in the abstract an informative and balanced summary of what was done and what was found                                                                                  | 2                  |
| <b>Introduction</b>          |        |                                                                                                                                                                                      |                    |
| Background/rationale         | 2      | Explain the scientific background and rationale for the investigation being reported                                                                                                 | 5,6                |
| Objectives                   | 3      | State specific objectives, including any prespecified hypotheses                                                                                                                     | 5                  |
| <b>Methods</b>               |        |                                                                                                                                                                                      |                    |
| Study design                 | 4      | Present key elements of study design early in the paper                                                                                                                              | 6                  |
| Setting                      | 5      | Describe the setting, locations, and relevant dates, including periods of recruitment, exposure, follow-up, and data collection                                                      | 6,7                |
| Participants                 | 6      | (a) Give the eligibility criteria, and the sources and methods of selection of participants                                                                                          | 6                  |
| Variables                    | 7      | Clearly define all outcomes, exposures, predictors, potential confounders, and effect modifiers. Give diagnostic criteria, if applicable                                             | 7,8                |
| Data sources/<br>measurement | 8*     | For each variable of interest, give sources of data and details of methods of assessment (measurement). Describe comparability of assessment methods if there is more than one group | 7,8                |
| Bias                         | 9      | Describe any efforts to address potential sources of bias                                                                                                                            | 7,8                |
| Study size                   | 10     | Explain how the study size was arrived at                                                                                                                                            | 7                  |
| Quantitative variables       | 11     | Explain how quantitative variables were handled in the analyses. If applicable, describe which groupings were chosen and why                                                         | 8,9                |
| Statistical methods          | 12     | (a) Describe all statistical methods, including those used to control for confounding                                                                                                | 8,9                |
|                              |        | (b) Describe any methods used to examine subgroups and interactions                                                                                                                  | 8,9                |
|                              |        | (c) Explain how missing data were addressed                                                                                                                                          | 13                 |
|                              |        | (d) If applicable, describe analytical methods taking account of sampling strategy                                                                                                   |                    |
|                              |        | (e) Describe any sensitivity analyses                                                                                                                                                |                    |
| <b>Results</b>               |        |                                                                                                                                                                                      |                    |

|                          |     |                                                                                                                                                                                                              |       |
|--------------------------|-----|--------------------------------------------------------------------------------------------------------------------------------------------------------------------------------------------------------------|-------|
| Participants             | 13* | (a) Report numbers of individuals at each stage of study—eg numbers potentially eligible, examined for eligibility, confirmed eligible, included in the study, completing follow-up, and analysed            | 9     |
|                          |     | (b) Give reasons for non-participation at each stage                                                                                                                                                         | 9     |
|                          |     | (c) Consider use of a flow diagram                                                                                                                                                                           |       |
| Descriptive data         | 14* | (a) Give characteristics of study participants (eg demographic, clinical, social) and information on exposures and potential confounders                                                                     | 9,10  |
|                          |     | (b) Indicate number of participants with missing data for each variable of interest                                                                                                                          | 11    |
| Outcome data             | 15* | Report numbers of outcome events or summary measures                                                                                                                                                         | 10-13 |
| Main results             | 16  | (a) Give unadjusted estimates and, if applicable, confounder-adjusted estimates and their precision (eg, 95% confidence interval). Make clear which confounders were adjusted for and why they were included | 10-13 |
|                          |     | (b) Report category boundaries when continuous variables were categorized                                                                                                                                    |       |
|                          |     | (c) If relevant, consider translating estimates of relative risk into absolute risk for a meaningful time period                                                                                             |       |
| Other analyses           | 17  | Report other analyses done—eg analyses of subgroups and interactions, and sensitivity analyses                                                                                                               |       |
| <b>Discussion</b>        |     |                                                                                                                                                                                                              |       |
| Key results              | 18  | Summarise key results with reference to study objectives                                                                                                                                                     | 14    |
| Limitations              | 19  | Discuss limitations of the study, taking into account sources of potential bias or imprecision. Discuss both direction and magnitude of any potential bias                                                   | 15    |
| Interpretation           | 20  | Give a cautious overall interpretation of results considering objectives, limitations, multiplicity of analyses, results from similar studies, and other relevant evidence                                   | 14,15 |
| Generalisability         | 21  | Discuss the generalisability (external validity) of the study results                                                                                                                                        | 16    |
| <b>Other information</b> |     |                                                                                                                                                                                                              |       |
| Funding                  | 22  | Give the source of funding and the role of the funders for the present study and, if applicable, for the original study on which the present article is based                                                | 17    |

\*Give information separately for cases and controls in case-control studies and, if applicable, for exposed and unexposed groups in cohort and cross-sectional studies.

**Note:** An Explanation and Elaboration article discusses each checklist item and gives methodological background and published examples of transparent reporting. The STROBE checklist is best used in conjunction with this article (freely available on the Web sites of PLoS Medicine at <http://www.plosmedicine.org/>, Annals of Internal Medicine at <http://www.annals.org/>, and Epidemiology at <http://www.epidem.com/>). Information on the STROBE Initiative is available at [www.strobe-statement.org](http://www.strobe-statement.org).
